# Supplementary material for: An unprecedented approach to the Gabriel amine synthesis utilizing tosylhydrazones as alkylating agents
Source: Royal Society of Chemistry journal article supplement (doi:10.1039/c4ra05929h), 2014-07-30

Electronic Supplementary Information (ESI) for *RSC Advances*  
This journal is (c) The Royal Society of Chemistry 2014

**Supplementary Information for**

**An unprecedented approach to the Gabriel amine synthesis utilizing  
tosylhydrazones as alkylating agents**

**Arvind K. Yadav and Lal Dhar S. Yadav\***

*Green Synthesis Lab, Department of Chemistry, University of Allahabad,*

*Allahabad-211002, India*

*E-mail: ldsyadav@hotmail.com*

| <b>Contents:</b>                                                                     | <b>Page No.</b> |
|--------------------------------------------------------------------------------------|-----------------|
| I. General information                                                               | 2               |
| II. Procedures for the synthesis of compounds                                        | 2               |
| III. Spectral data of synthesised compounds                                          | 3-5             |
| IV. References                                                                       | 5               |
| V. Copies of <sup>1</sup> H and <sup>13</sup> C NMR spectra of synthesised compounds | 6-39            |

**General information:** All commercially available reagents were purchased from commercial suppliers and used without further purification. Solvents were purified by the usual methods and stored over molecular sieves. All reactions were performed using oven-dried glass ware heated on oil bath under a nitrogen atmosphere. Organic solutions were concentrated using a Buchi rotary evaporator. Column chromatography was carried out over silica gel (Merck 100–200 mesh) and TLC was performed using silica gel GF254 (Merck) plates. Melting points were determined by open glass capillary method and are uncorrected. IR spectra in KBr/neat were recorded on a Perkin-Elmer 993 IR spectrophotometer. <sup>1</sup>H NMR (400 MHz) and <sup>13</sup>C NMR (100 MHz) spectra were recorded on a Bruker AVII spectrometer in CDCl<sub>3</sub>, TMS as internal reference with chemical shift value being reported in ppm. All coupling constants (*J*) are reported in Hertz (Hz). MS (EI) spectra were recorded on double focusing mass spectrometer.

**General procedure for synthesis of *N*-(1-phenylethyl)phthalimide (2a):** A mixture of tosylhydrazone **1a'** (1.0 mmol), phthalimide (1.0 mmol), Cs<sub>2</sub>CO<sub>3</sub> (3.0 equiv.), CuI (10 mol%) and dioxane (4 mL) was stirred at 110 °C for 2 h under a nitrogen atmosphere. After completion of the reaction (as monitored by TLC), the mixture was allowed to reach at r.t. It was quenched with water (10 mL) and extracted with ethyl acetate (3 × 10 mL). The organic phase was dried over anhydrous magnesium sulfate and concentrated in vacuo. The crude product was purified by silica gel column chromatography (EtOAc-Hexane) to give the desired compound **2a**.

**General procedure for hydrazinolysis<sup>1</sup> of *N*-alkylphthalimides **2** to **3**:** A mixture of *N*-alkylphthalimide (1.0 mmol) and H<sub>2</sub>NNH<sub>2</sub>.H<sub>2</sub>O (80%, 1.5 mmol) in methanol (2 mL) was refluxed for 1-2 h. Then, 2 mL of acidified water was added and the precipitated solid (phthalazine) was removed by filtration. The filtrate was made alkaline with 40% excess of NaOH solution and extracted with 4 mL diethyl ether (2 × 4 mL). The combined ether extracts were dried over anhydrous magnesium sulfate. The resulting solution was concentrated in a rotary evaporator and purified by silica gel column chromatography give pure primary amines **3**.

**General procedure for one-pot reductive hydroamination of carbonyl compounds **1** to **3**:** A mixture of carbonyl compound **1** (1.0 mmol) and TsNHNH<sub>2</sub> (1.0 mmol) in dioxane (4 mL) was stirred at 60 °C for 30 min. Then, phthalimide (1.0 mmol), Cs<sub>2</sub>CO<sub>3</sub> (3.0 equiv.) and CuI (10 mol%) were added and the content stirred at 110 °C for 2-4 h under a nitrogen atmosphere. After the completion of the reaction (as monitor by TLC), H<sub>2</sub>NNH<sub>2</sub>.H<sub>2</sub>O (80%, 1.5 mmol) was added and the mixture was stirred at same temperature for 1-2 h. The reaction mixture was allowed to cool to r.t. It was quenched with acidified water (10 mL) followed by filtration. The filtrate was made alkaline with 40% excess of NaOH solution and extracted with diethyl ether (3 × 10 mL). The organic phase was dried over anhydrous magnesium sulfate and concentrated in vacuo. The crude product was purified by silica gel column chromatography (EtOAc-Hexane) to give an analytically pure sample of **3a-3p**. The charecterisation data of all the products are given below with relevant references.<sup>2</sup>

***N*-(1-phenylethyl)phthalimide (2a)<sup>2c</sup>**: White solid (mp 125-126 °C, lit (126 °C), IR (KBr): 2981, 2832, 1774, 1720, 756, 721, 698 cm<sup>-1</sup>, <sup>1</sup>H NMR (400 MHz, CDCl<sub>3</sub>): δ = 7.42 (d, *J* = 8.4 Hz, 2H), 7.30-7.29 (d, *J* = 8.4 Hz, 2H), 7.28-7.13 (m, 4H), 4.24 (q, *J* = 7.2 Hz, 1H), 1.76 (d, *J* = 7.2 Hz, 3H); <sup>13</sup>C NMR (100 MHz, CDCl<sub>3</sub>): δ = 168.1, 140.3, 133.6, 131.7, 128.6, 127.4, 127.2, 123.2, 49.4, 17.5. HRMS (EI): calcd for C<sub>16</sub>H<sub>13</sub>NO<sub>2</sub> 252.1025, found 252.1021.

**1-Phenylethanamine (3a)<sup>2a,d,e</sup>**: Yellowish oil, IR (neet): 3359, 3062, 3028, 2968, 2640, 1605, 1572, 1451, 1362, 1083, 1028, 841, 770, 703, 521 cm<sup>-1</sup>. <sup>1</sup>H NMR (400 MHz, CDCl<sub>3</sub>): δ = 7.36-7.16 (m, 5H), 4.16 (q, *J* = 6.6 Hz, 1H), 1.40 (d, *J* = 6.6 Hz, 3H), 1.34 (br s, 2H); <sup>13</sup>C NMR (100 MHz, CDCl<sub>3</sub>): δ = 138.6, 134.1, 131.6, 130.1, 43.4, 21.2. HRMS (EI): calcd for C<sub>8</sub>H<sub>11</sub>N 121.0891, found 121.0890.

**1-(4-Methoxyphenyl)ethanamine (3b)<sup>2d</sup>**: Yellowish oil, IR (neet): 3387, 3238, 3042, 2998, 2934, 2834, 1611, 1541, 1463, 1246, 1175, 1034, 822, 753, 637 cm<sup>-1</sup>. <sup>1</sup>H NMR (400 MHz, CDCl<sub>3</sub>): δ = 7.29-7.24 (m, 2H), 6.85-6.35 (m, 2H), 4.12 (q, *J* = 6.6 Hz, 1H), 3.80 (s, 3H), 1.35 (d, *J* = 6.5 Hz, 3H), 1.29 (br s, 2H); <sup>13</sup>C NMR (100 MHz, CDCl<sub>3</sub>): δ = 158.3, 136.6, 130.1, 113.6, 56.4, 43.6, 23.4; HRMS (EI): calcd for C<sub>9</sub>H<sub>13</sub>NO 151.0997, found 151.0995.

**Diphenylmethanamine (3c)<sup>2d,e</sup>**: Yellowish oil, IR (neet): 3369, 3243, 3060, 3026, 1600, 1492, 1452, 1277, 1190, 1027, 903, 742, 699, 552 cm<sup>-1</sup>. <sup>1</sup>H NMR (400 MHz, CDCl<sub>3</sub>): δ = 7.39-7.25 (m, 10H), 5.25 (s, 1H), 1.53 (br s, 2H); <sup>13</sup>C NMR (100 MHz, CDCl<sub>3</sub>): δ = 142.5, 129.7, 127.1, 123.5, 58.4; HRMS (EI): calcd for C<sub>13</sub>H<sub>13</sub>N 183.1048, found 183.1045.

**Cyclohexanamine (3d)**: Yellowish oil, IR (neet): 3406, 3367, 3028, 2950, 1260, 1117, 1025, 653 cm<sup>-1</sup>. <sup>1</sup>H NMR (400 MHz, CDCl<sub>3</sub>): δ = 2.75 (d, *J* = 4.8 Hz, 1H), 1.73-1.53 (m, 4H), 1.33-1.17 (m, 8H); <sup>13</sup>C NMR (100 MHz, CDCl<sub>3</sub>): δ = 42.4, 32.3, 28.0, 22.6. HRMS (EI): calcd for C<sub>6</sub>H<sub>13</sub>N 99.1048, found 99.1046.

**1-(Pyridin-2-yl)ethanamine (3e)**: Yellowish oil, IR (neet): 3376, 3257, 3028, 2954, 2794, 1604, 1587, 1453, 1332, 1090, 1003, 817, 741, 694 cm<sup>-1</sup>. <sup>1</sup>H NMR (400 MHz, CDCl<sub>3</sub>): δ = 8.59 (t, *J* = 6.4, 1H), 7.73-7.67 (m, 1H), 7.47 (m, 1H), 7.23-7.19 (m, 1H), 4.28 (q, *J* = 8.2 Hz, 1H), 1.37 (d, *J* = 8.2 Hz, 3H), 1.32 (br s, 2H); <sup>13</sup>C NMR (100 MHz, CDCl<sub>3</sub>): δ = 147.5, 141.6, 135.6, 109.2, 108.7, 41.7, 22.3. HRMS (EI): calcd for C<sub>7</sub>H<sub>10</sub>N<sub>2</sub> 122.0844, found 122.0840.

**1-(4-Bromophenyl)ethanamine (3f)**: Yellowish oil, IR (neat): 3361, 3326, 1617, 1512, 1437, 1203, 1151, 1082, 1035, 850, 741, 687, 553 cm<sup>-1</sup>. <sup>1</sup>H NMR (400 MHz, CDCl<sub>3</sub>): δ = 7.36 (d, *J* = 8.4 Hz, 2H), 7.16 (d, *J* = 8.4 Hz, 2H), 4.15 (q, 5.6 Hz, 1H), 1.41 (d, *J* = 5.6 Hz, 3H), 1.33 (br s,

2H);  $^{13}\text{C}$  NMR (100 MHz,  $\text{CDCl}_3$ ):  $\delta = 139.6, 131.7, 128.4, 121.9, 47.0, 22.1$ . HRMS (EI): calcd for  $\text{C}_8\text{H}_{10}\text{BrN}$  198.9997, found 199.0007.

**Phenylmethanamine (3g)**<sup>2a,b</sup>: Yellowish oil, IR (neat): 3400, 3313, 3080, 3040, 2980, 2815, 1610, 1595, 1421, 1247, 1181, 1040, 817, 705, 681  $\text{cm}^{-1}$ .  $^1\text{H}$  NMR (400 MHz,  $\text{CDCl}_3$ ):  $\delta = 7.34$ -7.22 (m, 5H), 3.85 (s, 2H), 1.36 (br s, 2H);  $^{13}\text{C}$  NMR (100 MHz,  $\text{CDCl}_3$ ):  $\delta = 144.5, 129.0, 127.2, 123.6, 49.4$ ; HRMS (EI): calcd for  $\text{C}_7\text{H}_9\text{N}$  107.0735, found 107.0732.

***p*-Tolylmethanamine (3h)**<sup>2a</sup>: Colorless oil, IR (neat): 3395, 3290, 2971, 2857, 1610, 1513, 1208, 114t, 800, 747, 702  $\text{cm}^{-1}$ .  $^1\text{H}$  NMR (400 MHz,  $\text{CDCl}_3$ ):  $\delta = 7.20$  (d,  $J = 6.4$  Hz, 2H), 7.15 (d,  $J = 6.4$  Hz, 2H), 3.72 (s, 2H), 2.34 (s, 3H), 1.34 (br s, 2H);  $^{13}\text{C}$  NMR (100 MHz,  $\text{CDCl}_3$ ):  $\delta = 139.8, 136.2, 129.2, 127.2, 45.7, 21.6$ ; HRMS (EI): calcd for 122.0981, found 122.0980.

**(4-Methoxyphenyl)methanamine (3i)**<sup>2a</sup>: Yellowish oil; IR (neat): 3397, 3287, 1611, 1519, 1437, 1256, 1132, 1119, 813, 746  $\text{cm}^{-1}$ .  $^1\text{H}$  NMR (400 MHz,  $\text{CDCl}_3$ ):  $\delta = 7.28$  (d,  $J = 5.8$  Hz, 2H), 6.99 (d,  $J = 6.0$  Hz, 2H), 3.97 (s, 5H), 1.85 (br s, 2H);  $^{13}\text{C}$  NMR (100 MHz,  $\text{CDCl}_3$ ):  $\delta = 158.2, 132.5, 129.2, 114.2, 55.4, 45.4$ ; HRMS (EI): calcd for  $\text{C}_8\text{H}_{11}\text{NO}$ , 137.0840, found 137.0842.

**(4-Fluorophenyl)methanamine (3j)**<sup>2a,b</sup>: Yellowish oil, IR (neat): 3381, 3337, 2973, 2846, 1606, 1503, 1357, 1253, 1141, 1080, 1035, 912, 803, 757, 693, 501  $\text{cm}^{-1}$ .  $^1\text{H}$  NMR (400 MHz,  $\text{CDCl}_3$ ):  $\delta = 7.25$  (m, 2H), 7.03 (m, 2H), 3.77 (s, 2H), 1.37 (br s, 2H);  $^{13}\text{C}$  NMR (100 MHz,  $\text{CDCl}_3$ ):  $\delta = 159.0, 137.6, 127.2, 115.6, 49.4$ ; HRMS (EI): calcd for  $\text{C}_7\text{H}_8\text{FN}$  125.0640, found 125.0636.

**(4-Chlorophenyl)methanamine (3k)**: Yellowish oil, IR (neat): 3369, 3307, 2953, 2836, 1641, 1547, 1432, 1241, 1103, 807, 775, 712, 681  $\text{cm}^{-1}$ .  $^1\text{H}$  NMR (400 MHz,  $\text{CDCl}_3$ )  $\delta = 7.64$  (d,  $J = 8.5$  Hz, 2H), 7.56 (d,  $J = 8.5$  Hz, 2H), 3.51 (s, 2H), 1.54 (br s, 2H);  $^{13}\text{C}$  NMR (100 MHz,  $\text{CDCl}_3$ )  $\delta = 138.6, 131.7, 128.4, 121.9, 53.0$ ; HRMS (EI): calcd for  $\text{C}_7\text{H}_8\text{ClN}$  141.0345, found 141.0341.

**4-(Aminomethyl)-*N,N*-dimethylbenzenamine (3l)**<sup>2a</sup>: Yellowish oil, IR (neat): 3387, 3313, 3037, 3007, 2971, 2821, 1612, 1522, 1345, 1186, 947, 806, 752, 693  $\text{cm}^{-1}$ .  $^1\text{H}$  NMR (400 MHz,  $\text{CDCl}_3$ ):  $\delta = 7.54$  (d,  $J = 8.5$  Hz, 2H), 6.74 (d,  $J = 8.5$  Hz, 2H), 3.74 (s, 2H), 2.95 (s, 6H), 1.81 (br s, 2H);  $^{13}\text{C}$  NMR (100 MHz,  $\text{CDCl}_3$ ):  $\delta = 147.4, 129.5, 122.6, 112.3, 51.6, 40.3$ ; HRMS (EI): calcd for  $\text{C}_9\text{H}_{14}\text{N}_2$  150.1157, found 150.1154.

**2-Phenylethanamine (3m)**<sup>2a,b</sup>: Yellowish oil, IR: 3400, 3257, 2966, 2854, 1605, 1509, 1457, 1376, 1222, 1158, 811, 765, 551, 503  $\text{cm}^{-1}$ .  $^1\text{H}$  NMR (400 MHz,  $\text{CDCl}_3$ ):  $\delta = 7.31$ -7.19 (m, 5H),

2.96 (t,  $J = 5.6$  Hz, 2H), 2.87 (t,  $J = 5.6$  Hz, 2H), 1.06 (br s, 2H);  $^{13}\text{C}$  NMR (100 MHz,  $\text{CDCl}_3$ ):  $\delta = 139.0, 131.5, 129.6, 127.2, 43.1, 39.0$ ; HRMS (EI): calcd for  $\text{C}_8\text{H}_{11}\text{N}$ , 121.0891, found 121.0891.

**Hexan-1-amine (3n)<sup>2b</sup>**: Yellowish oil, IR (neet): 3407, 3373, 2938, 2875, 1263, 1137, 1061, 817, 623  $\text{cm}^{-1}$ .  $^1\text{H}$  NMR (400 MHz,  $\text{CDCl}_3$ ):  $\delta = 2.69$  (t,  $J = 5.6$  Hz, 2H), 1.45-1.22 (m, 10H), 0.90 (t,  $J = 5.6$  Hz, 3H);  $^{13}\text{C}$  NMR (100 MHz,  $\text{CDCl}_3$ )  $\delta = 41.1, 32.3, 30.5, 22.8, 21.3, 14.4$ . HRMS (EI): calcd for  $\text{C}_6\text{H}_{15}\text{N}$  101.1204, found 101.1203.

**(Furan-2-yl)methanamine (3o)<sup>2b</sup>**: Yellowish oil, IR (neet): 3387, 3341, 2937, 2875, 1604, 1546, 1445, 1263, 1137, 1061, 817, 784, 686  $\text{cm}^{-1}$ .  $^1\text{H}$  NMR (400 MHz,  $\text{CDCl}_3$ ):  $\delta = 7.35$  (d,  $J = 1.2$ , 1H), 6.31 (q,  $J = 1.2$  Hz, 1H), 6.13 (d,  $J = 1.2$  Hz, 1H), 3.82 (s, 2H), 1.42 (br s, 2H);  $^{13}\text{C}$  NMR (100 MHz,  $\text{CDCl}_3$ ):  $\delta = 146.2, 141.7, 109.2, 104.7, 42.1$ . HRMS (EI): calcd for  $\text{C}_5\text{H}_7\text{NO}$  97.0527, found 97.0525.

**(4-Nitrophenyl)methanamine (3p)**: Yellowish oil, IR (neat): 3381, 3337, 3108, 2952, 2832, 1608, 1595, 1507, 1352, 1253, 1141, 1080, 1035, 923, 851, 753, 682  $\text{cm}^{-1}$ .  $^1\text{H}$  NMR (400 MHz,  $\text{CDCl}_3$ ):  $\delta = 8.24$  (d,  $J = 9.0$  Hz, 2H), 7.60 (d,  $J = 9.0$  Hz, 2H), 3.84 (s, 2H), 1.57 (br s, 2H);  $^{13}\text{C}$  NMR (100 MHz,  $\text{CDCl}_3$ ):  $\delta = 148.3, 145.4, 127.0, 119.7, 52.6$ ; HRMS (EI): calcd for  $\text{C}_7\text{H}_8\text{N}_2\text{O}_2$  152.0586, found 152.0581.

## References:

- 1 W. G. Nigh, *J. Chem. Edu.*, 1975, **52**, 2348.
- 2 (a) D. Haddenham, L. Pasumansky, J. DeSoto, S. Eagon and B. Singaram, *J. Org. Chem.*, 2009, **74**, 1964; (b) C. Gunanathan and D. Milstein, *Angew. Chem. Int. Ed.* 2008, **47**, 8661; (c) J. Fraga-Dubreuil, G. Comak, A. W. Taylora and M. Poliakoff, *Green Chem.*, 2007, **9**, 1067; (d) B. Miriyala, S. Bhattacharyya and J. S. Williamson, *Tetrahedron*, 2004, **60**, 1463; (e) Franz J. Weiberth, Stan S. Hall, *J. Org. Chem.*, 1986, **51**, 5339.

Copies of  $^1\text{H}$  and  $^{13}\text{C}$  NMR spectra of all the products.

Compound 2a.  $^1\text{H}$  NMR Spectrum ( $\text{CDCl}_3$ ).

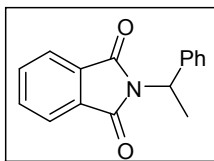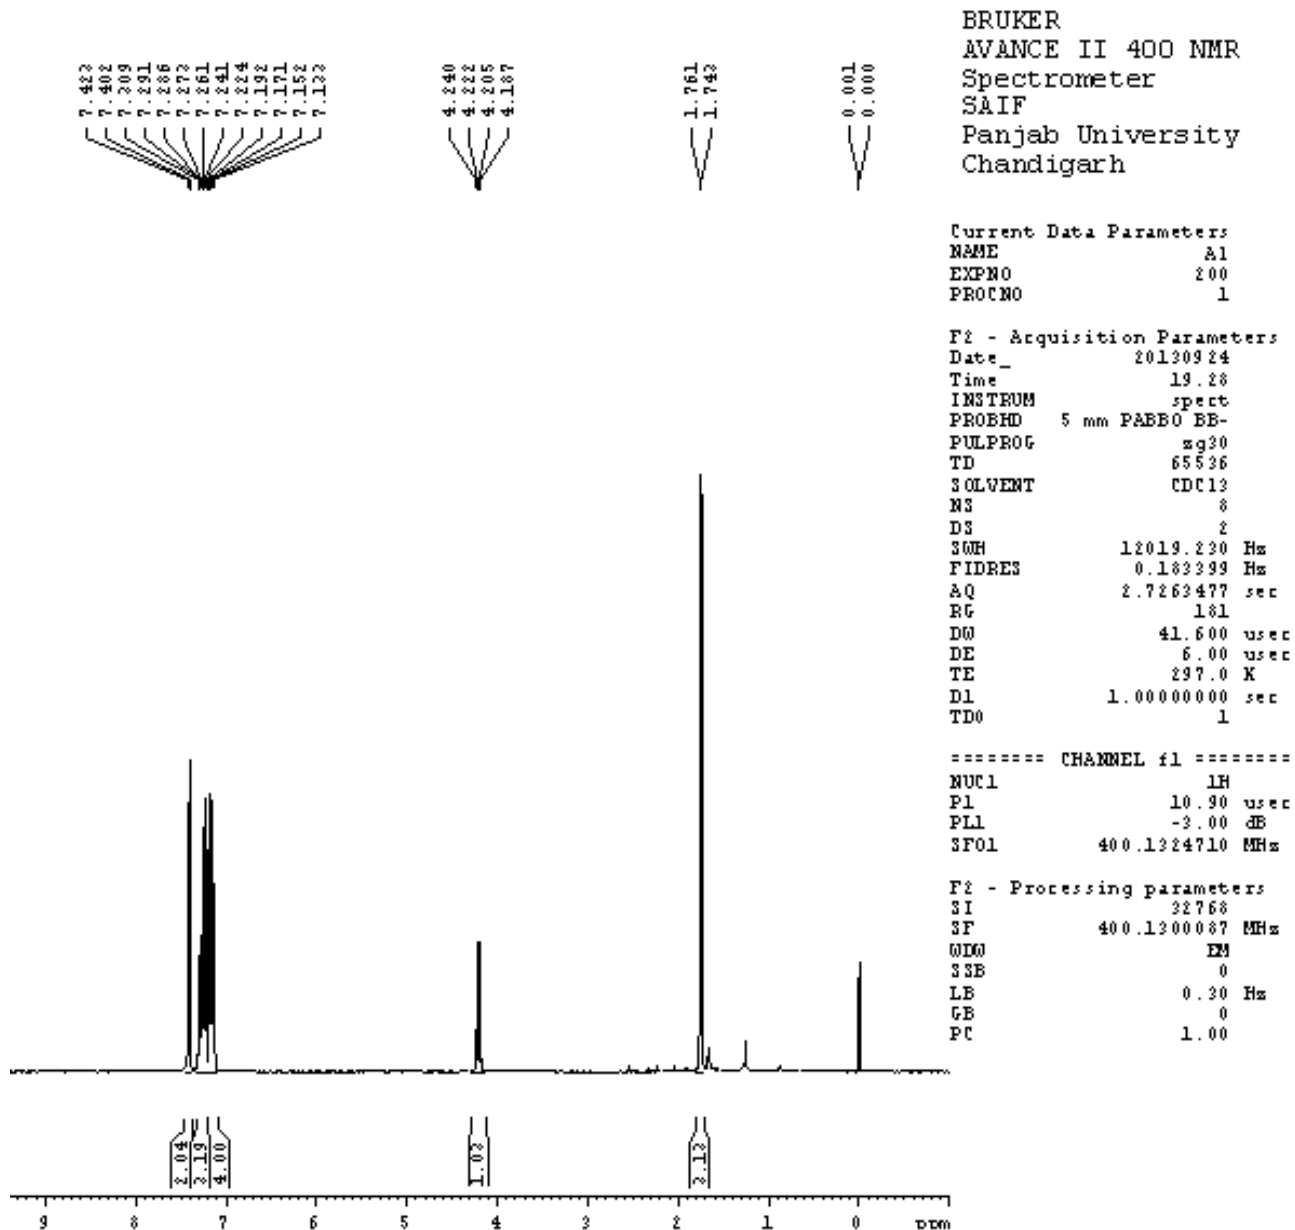

avtar saifpu@yahoo.co.in

Compound 2a.  $^{13}\text{C}$  NMR Spectrum ( $\text{CDCl}_3$ ).

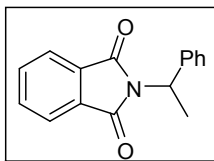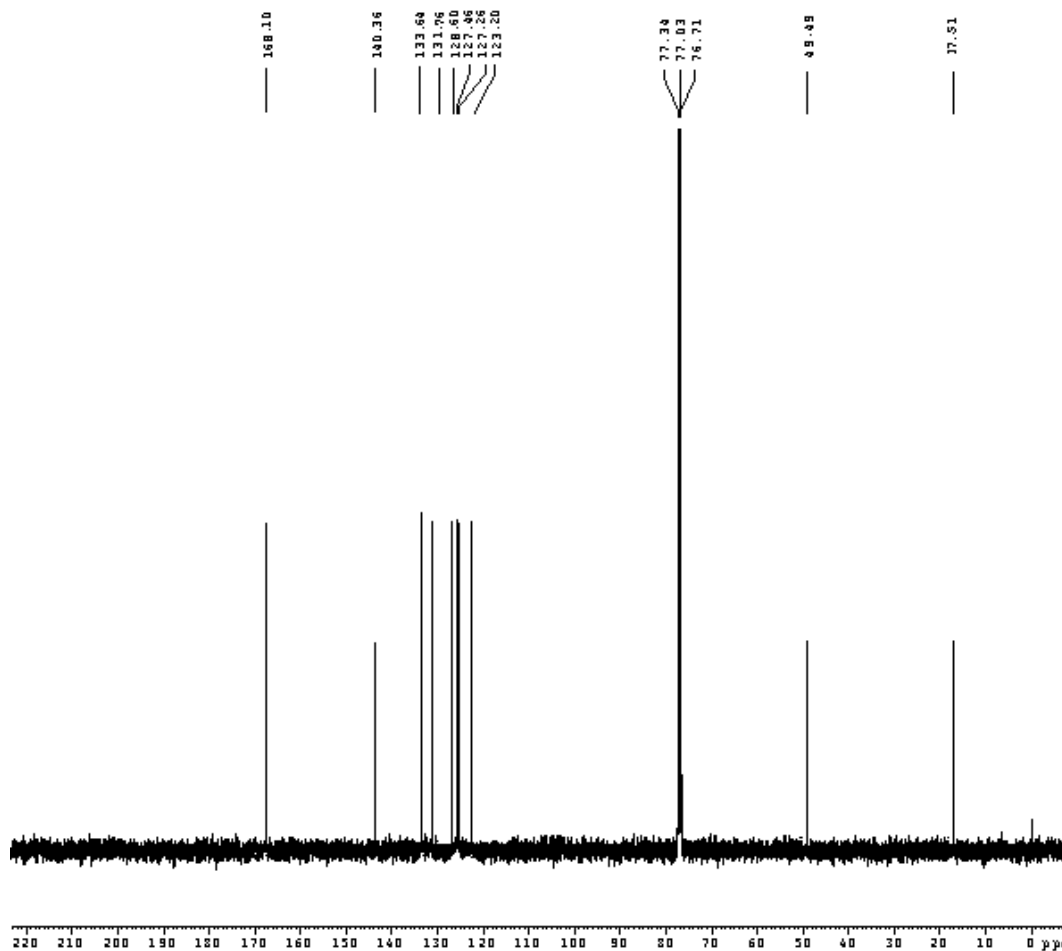

BRUKER  
 AVANCE II 400 NMR  
 Spectrometer  
 SAIF  
 Panjab University  
 Chandigarh

Current Data Parameters  
 NAME Apeyl3-2013-Administrato  
 EXPMO 480  
 PROCMD 1

F2 - Acquisition Parameters  
 Date\_ 20130512  
 Time 22.05  
 INSTRUM spect  
 PROBNM 5 mm PABBO BB-  
 PULPROG zgpg30  
 ID 65536  
 SOLVENT CDCl3  
 NS 512  
 DS 4  
 SWH 29761.504 Hz  
 FIDRES 0.454131 Hz  
 AQ 1.1010548 sec  
 RG 36  
 GW 16.800 usec  
 DE 6.00 usec  
 TE 300.0 K  
 D1 2.0000000 sec  
 d11 0.0300000 sec  
 DELTA 1.8999998 sec  
 FID 1

----- CHANNEL f1 -----  
 MFC1 13C  
 P1 9.60 usec  
 PL1 -2.00 dB  
 SFO1 100.628298 MHz

----- CHANNEL f2 -----  
 CPDPRG2 waltz16  
 MFC2 1H  
 PCPD2 80.00 usec  
 PL2 -3.00 dB  
 PL12 14.31 dB  
 PL13 18.00 dB  
 SFO2 400.1316005 MHz

F2 - Processing parameters  
 SI 32768  
 SF 100.6127690 MHz  
 WDW EM  
 SSB 0  
 LB 1.00 Hz  
 GB 0  
 PC 1.40

avtar saifpu@yahoo.co.in

Compound 3a.  $^1\text{H}$  NMR Spectrum ( $\text{CDCl}_3$ ).

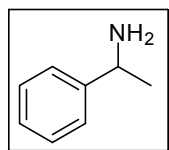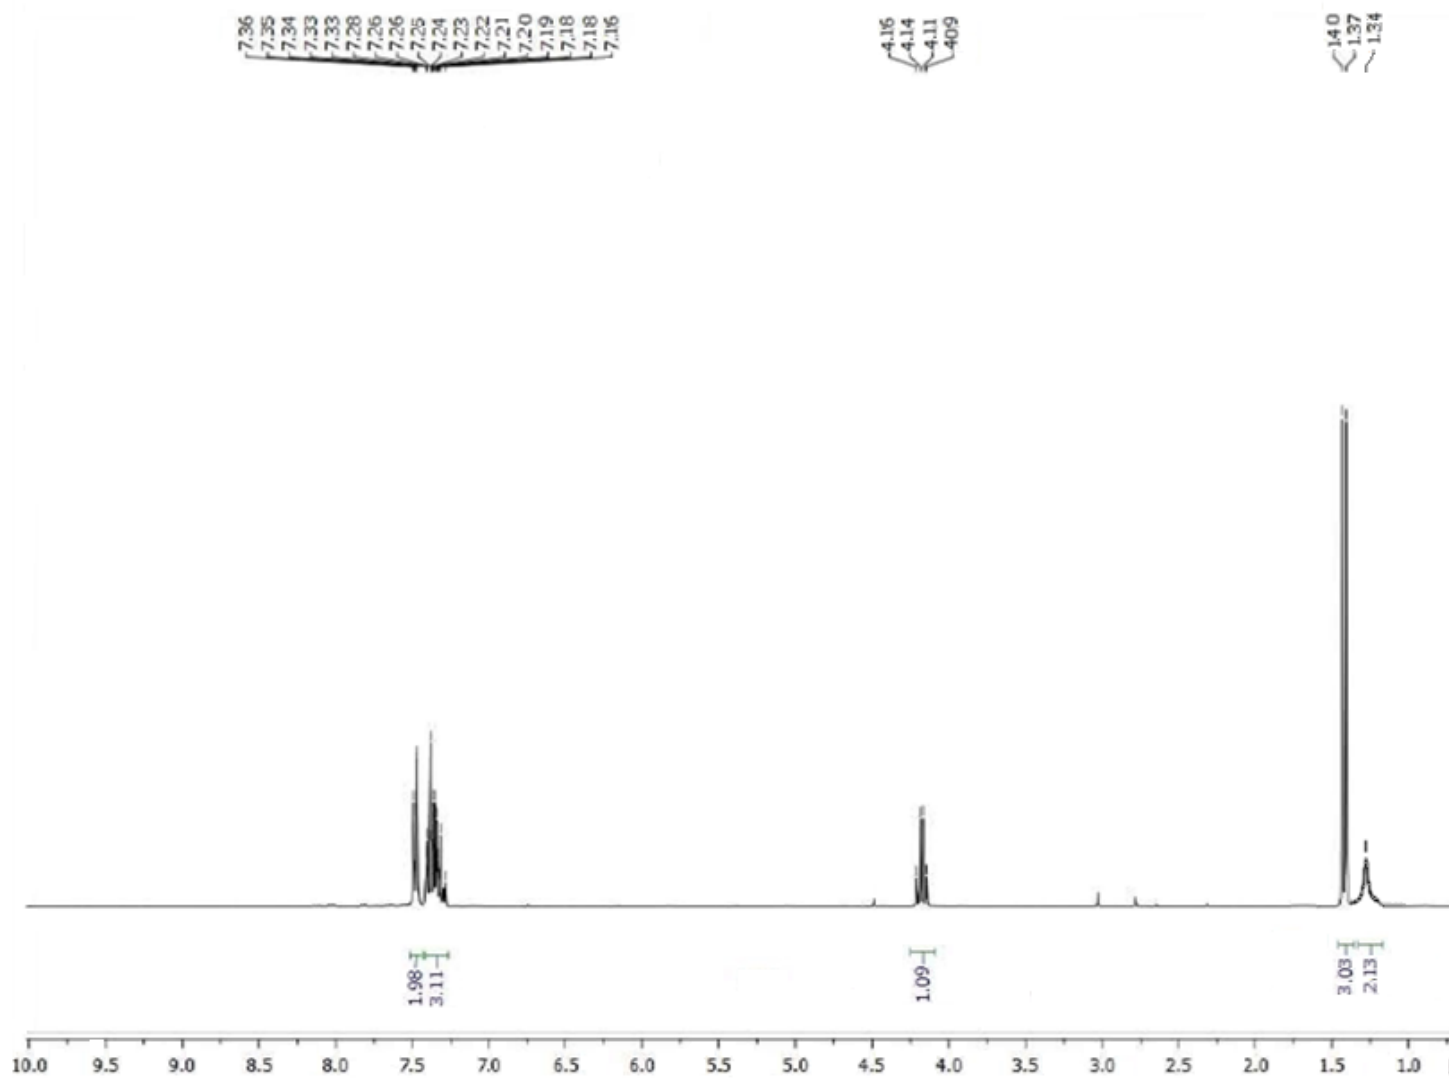



**Compound 3a.**  $^{13}\text{C}$  NMR Spectrum ( $\text{CDCl}_3$ ).

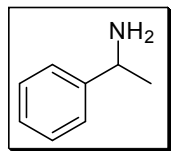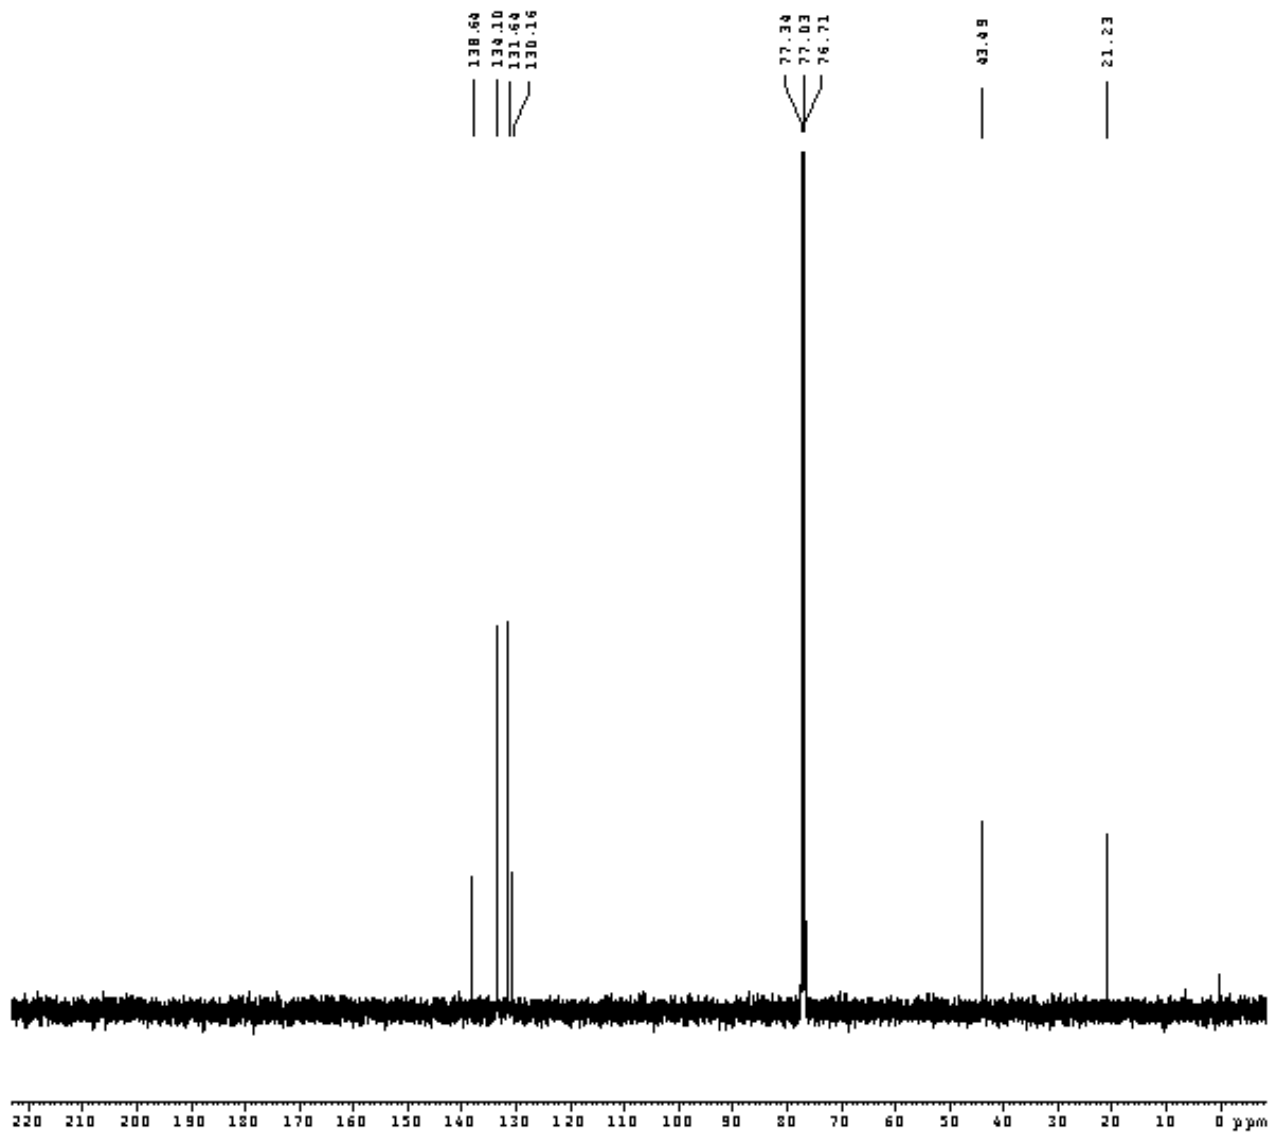

Compound 3b. <sup>1</sup>H NMR Spectrum (CDCl<sub>3</sub>).

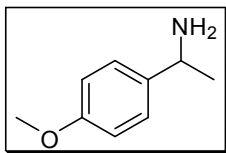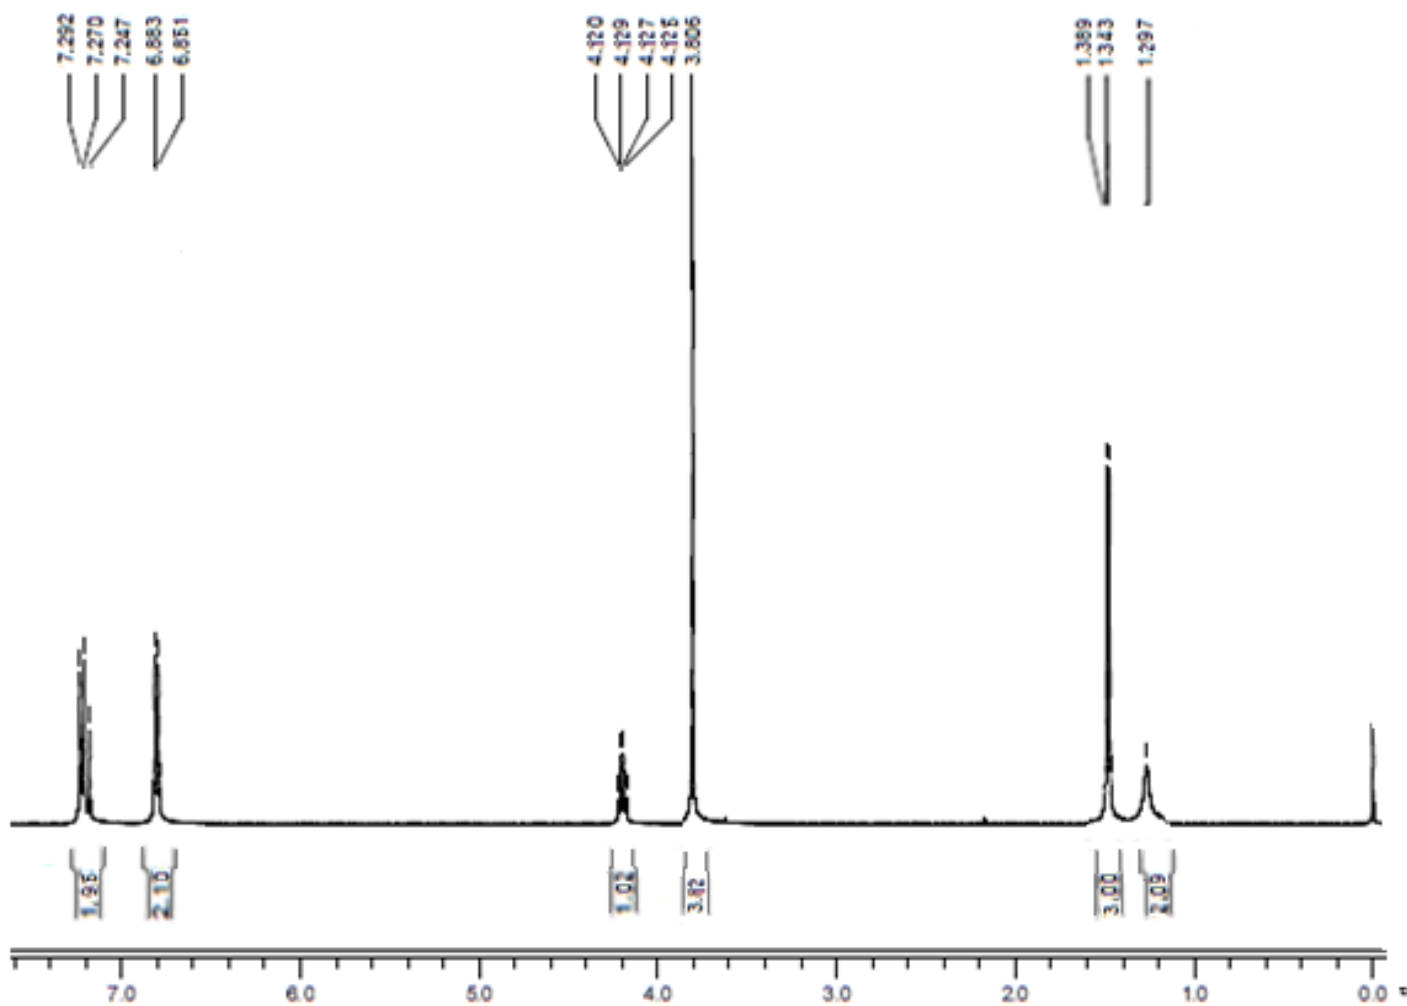

Compound 3b.  $^{13}\text{C}$  NMR Spectrum ( $\text{CDCl}_3$ ).

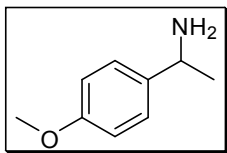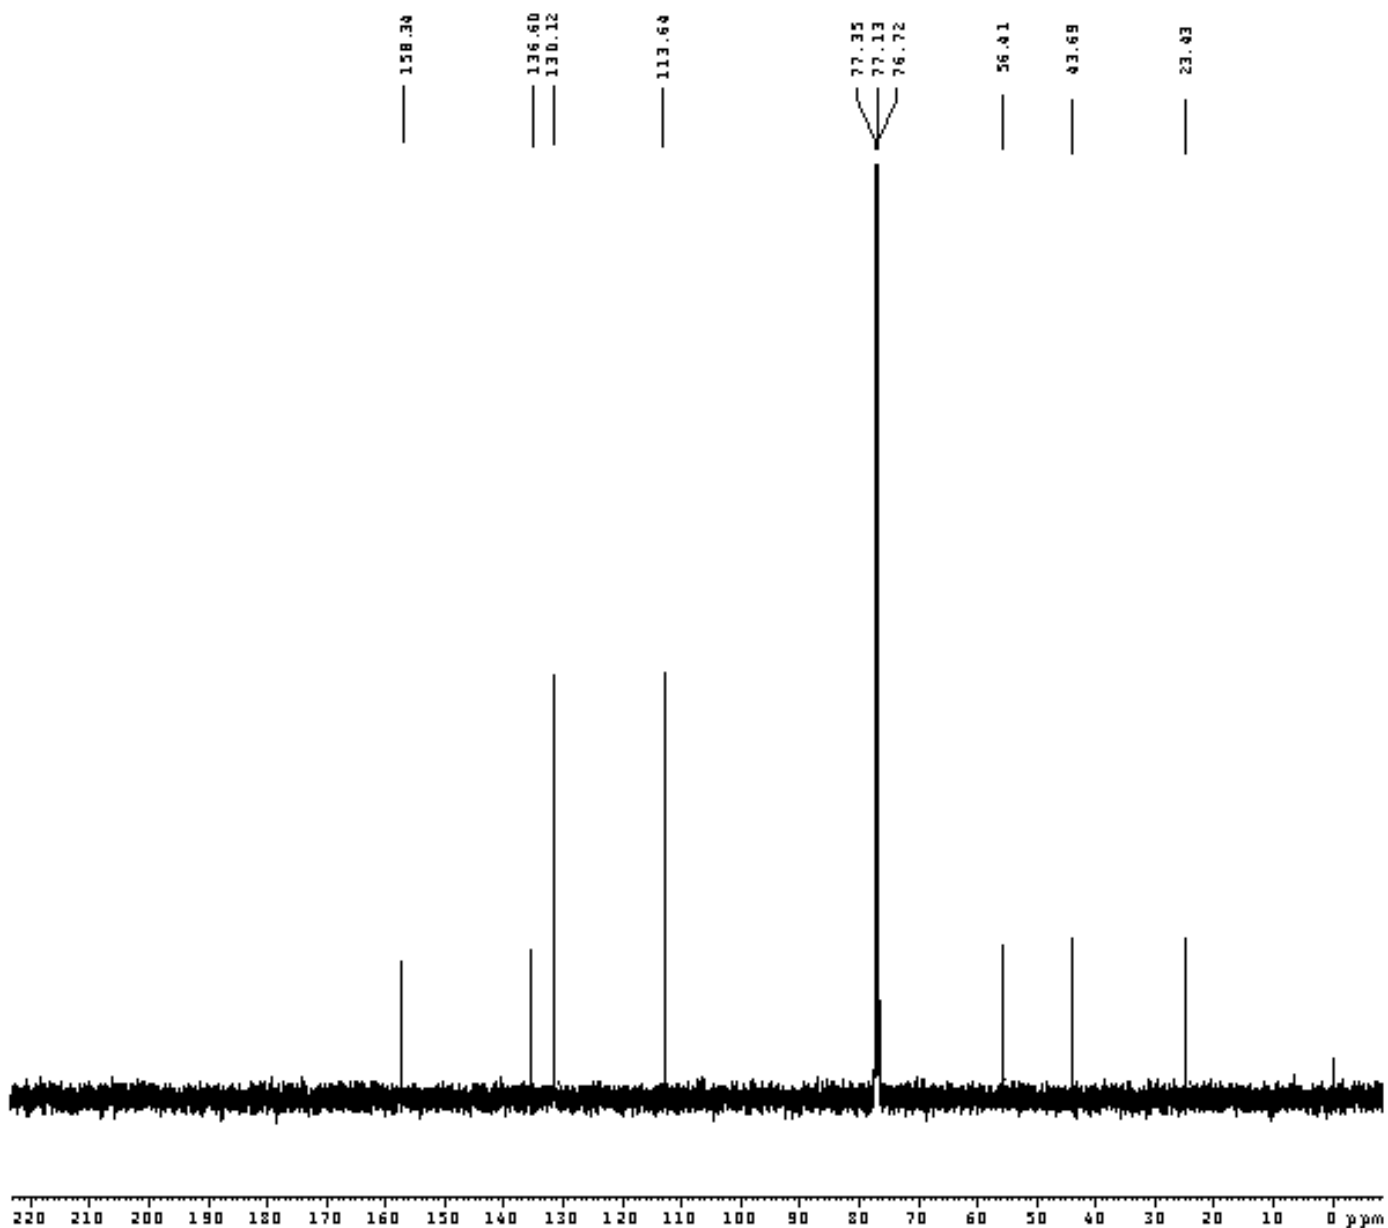

Compound 3c.  $^1\text{H}$  NMR Spectrum ( $\text{CDCl}_3$ ).

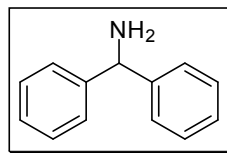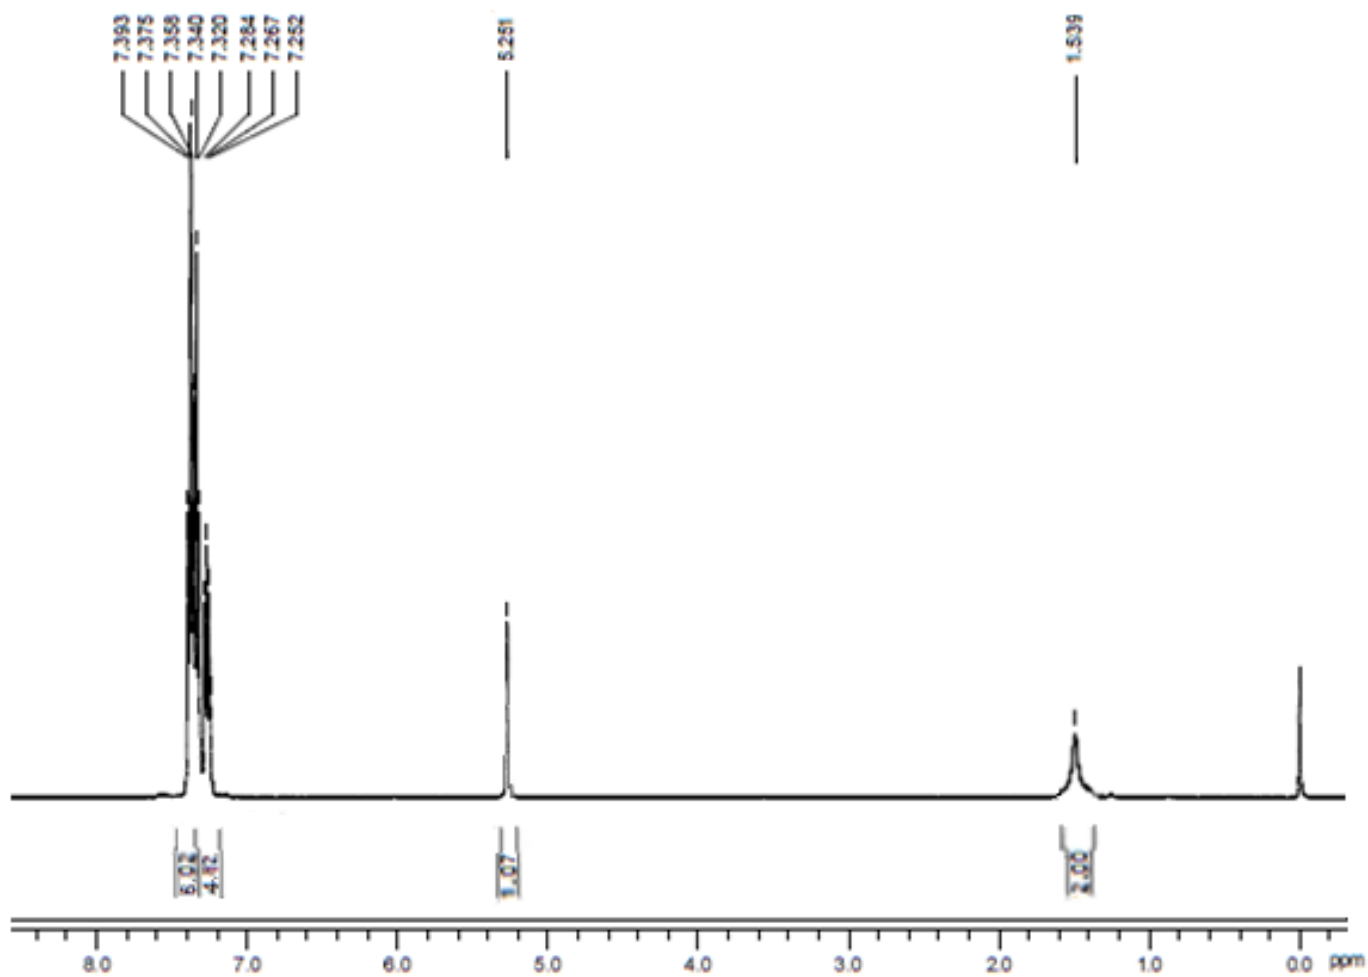

**Compound 3c.**  $^{13}\text{C}$  NMR Spectrum ( $\text{CDCl}_3$ ).

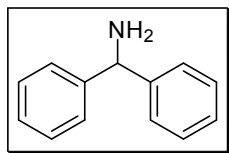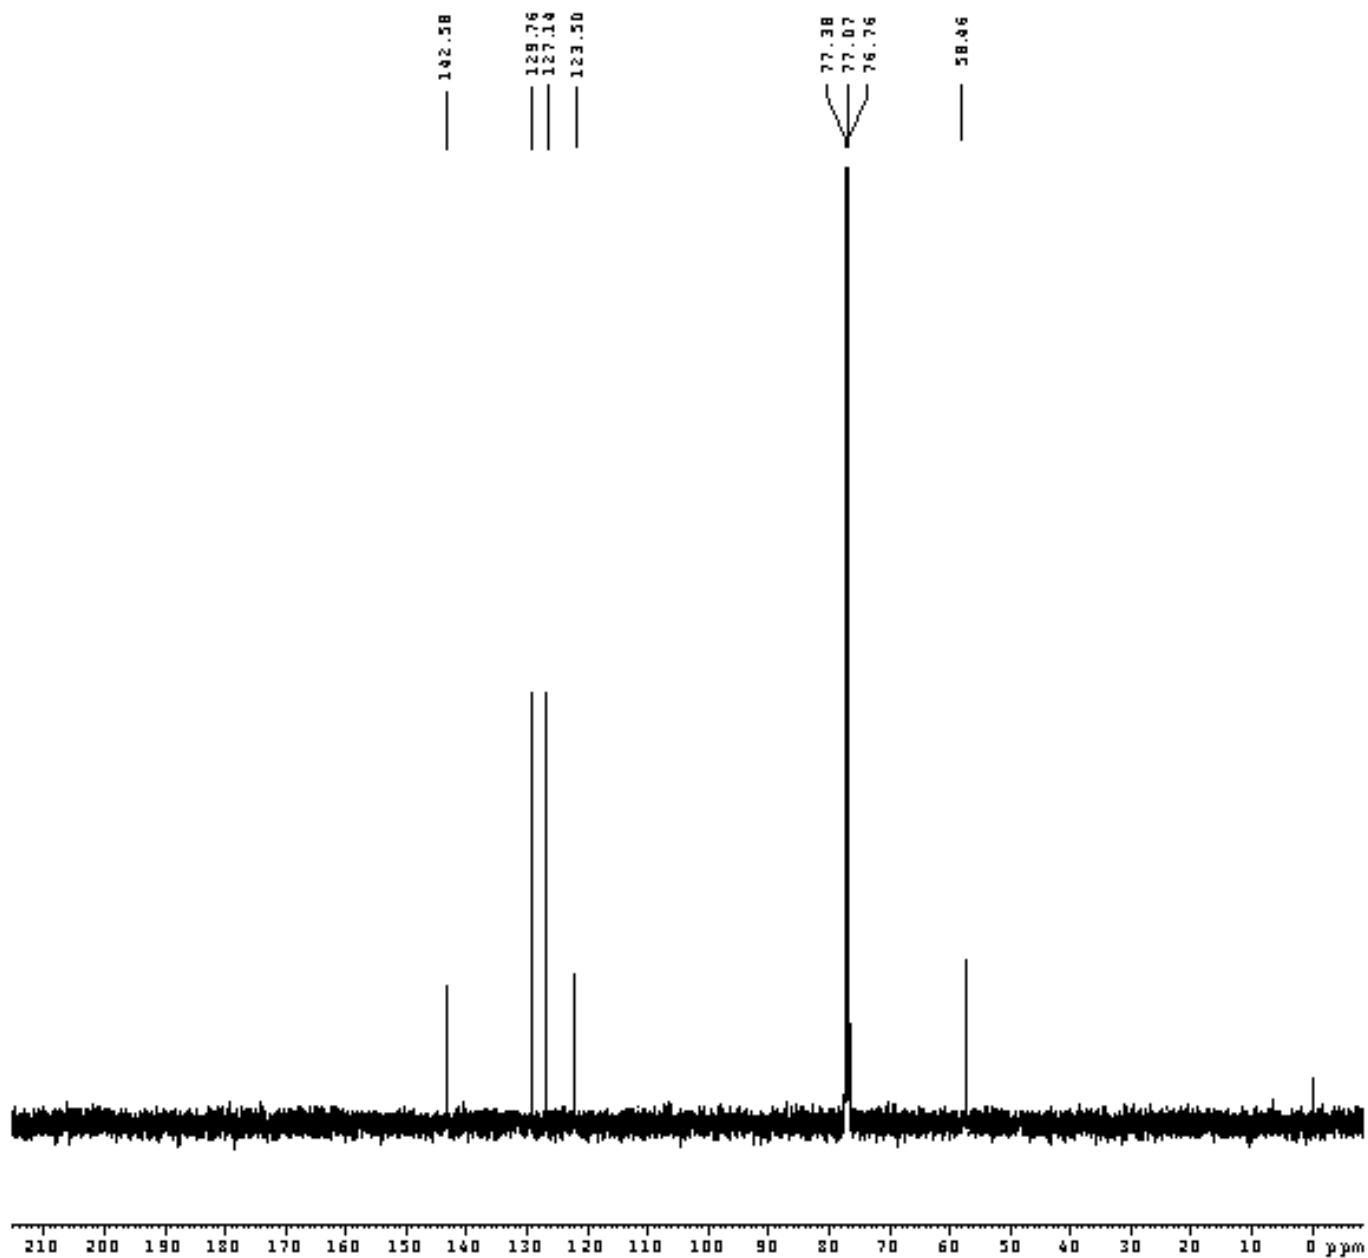

**Compound 3d.**  $^1\text{H}$  NMR Spectrum ( $\text{CDCl}_3$ ).

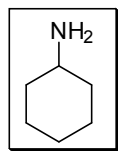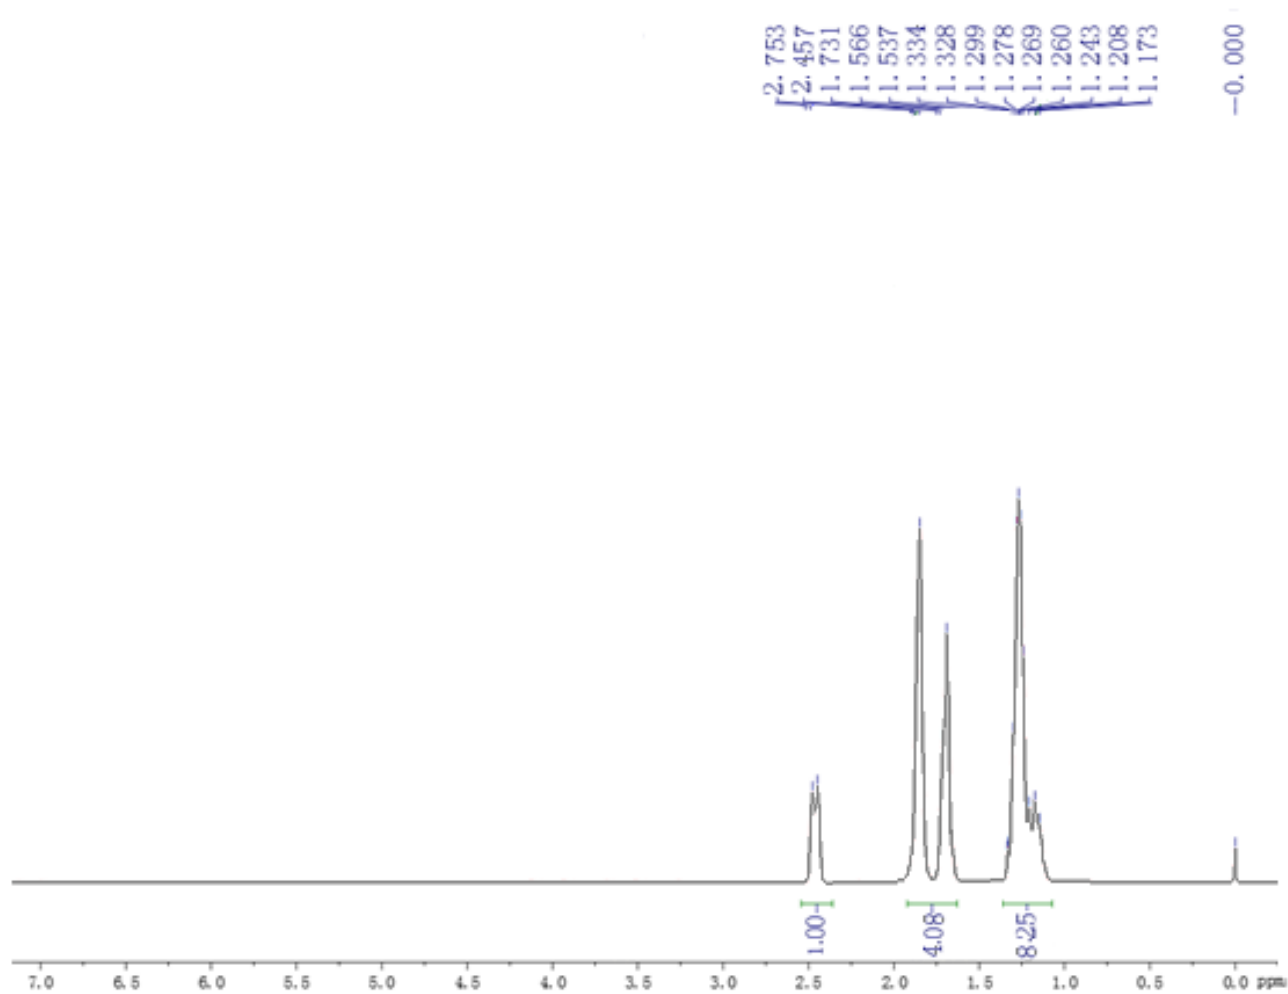

Compound 3d.  $^{13}\text{C}$  NMR Spectrum ( $\text{CDCl}_3$ ).

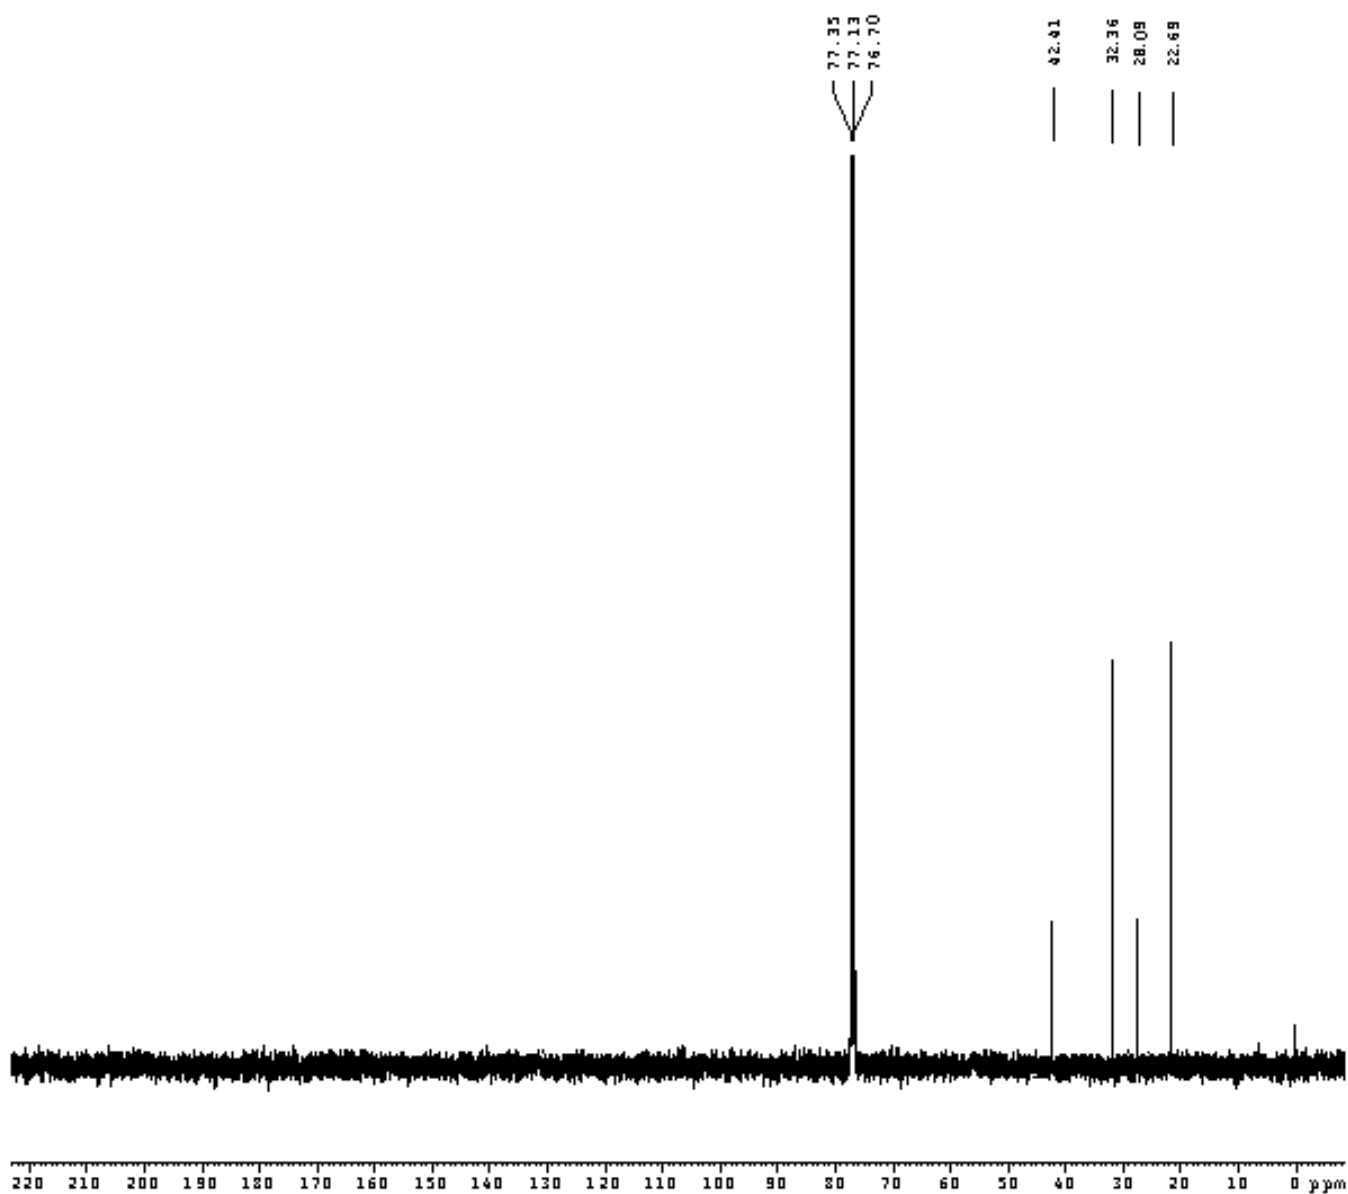

Compound 3e.  $^1\text{H}$  NMR Spectrum ( $\text{CDCl}_3$ ).

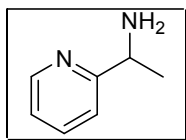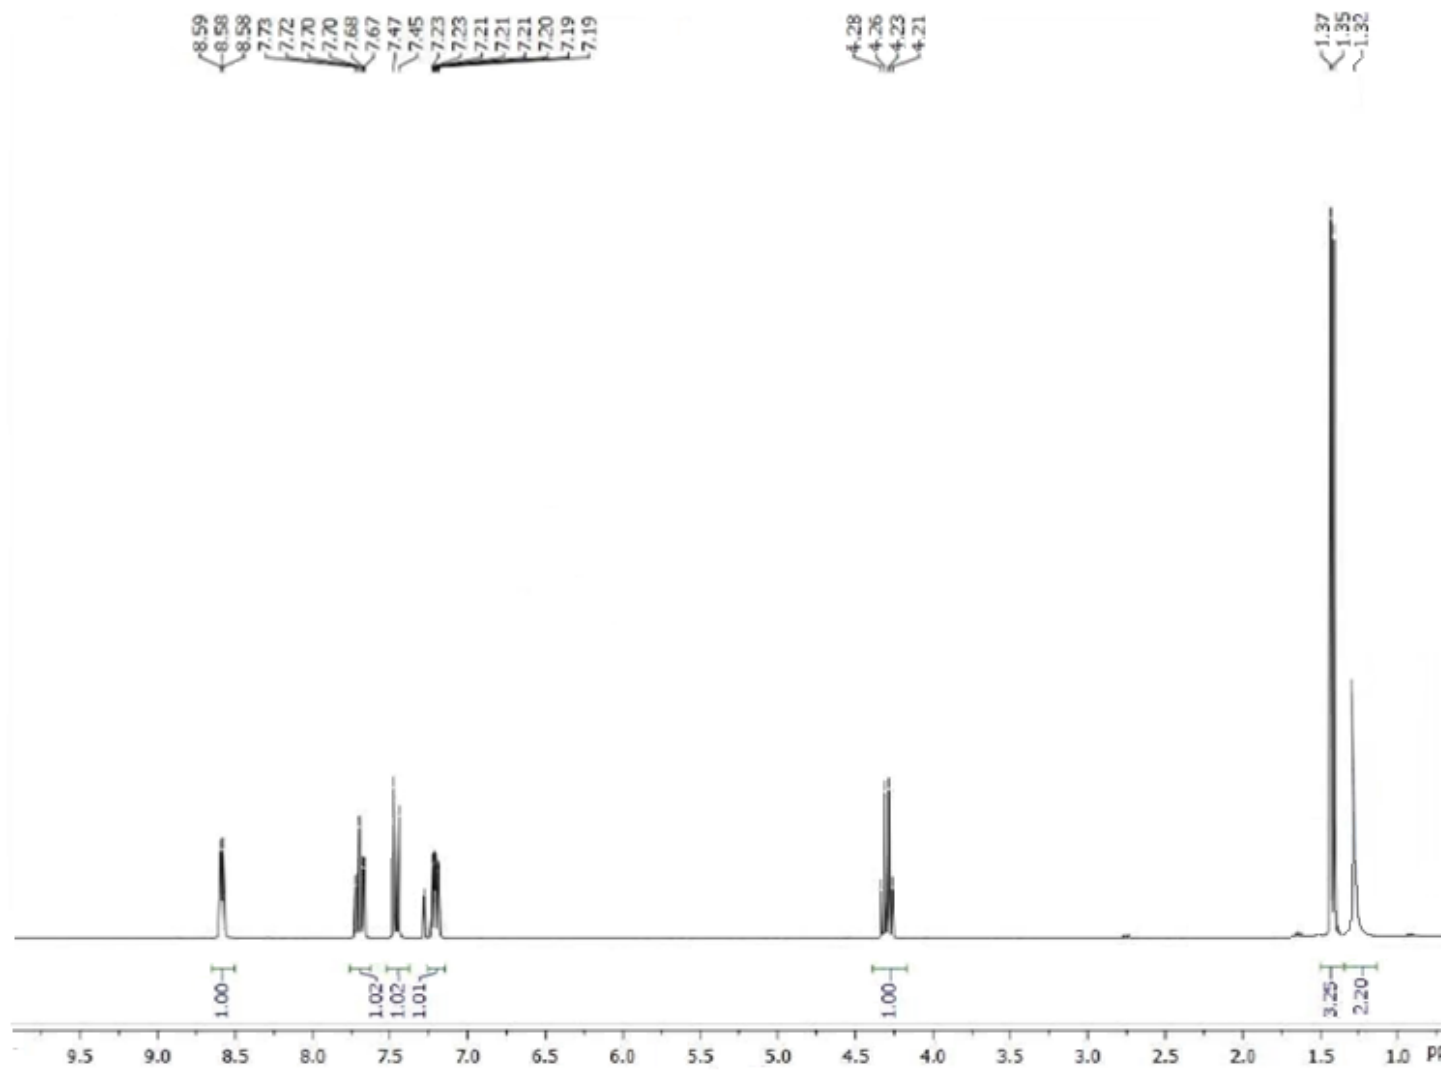



Compound 3e.  $^{13}\text{C}$  NMR Spectrum ( $\text{CDCl}_3$ ).

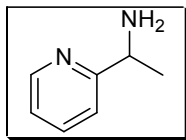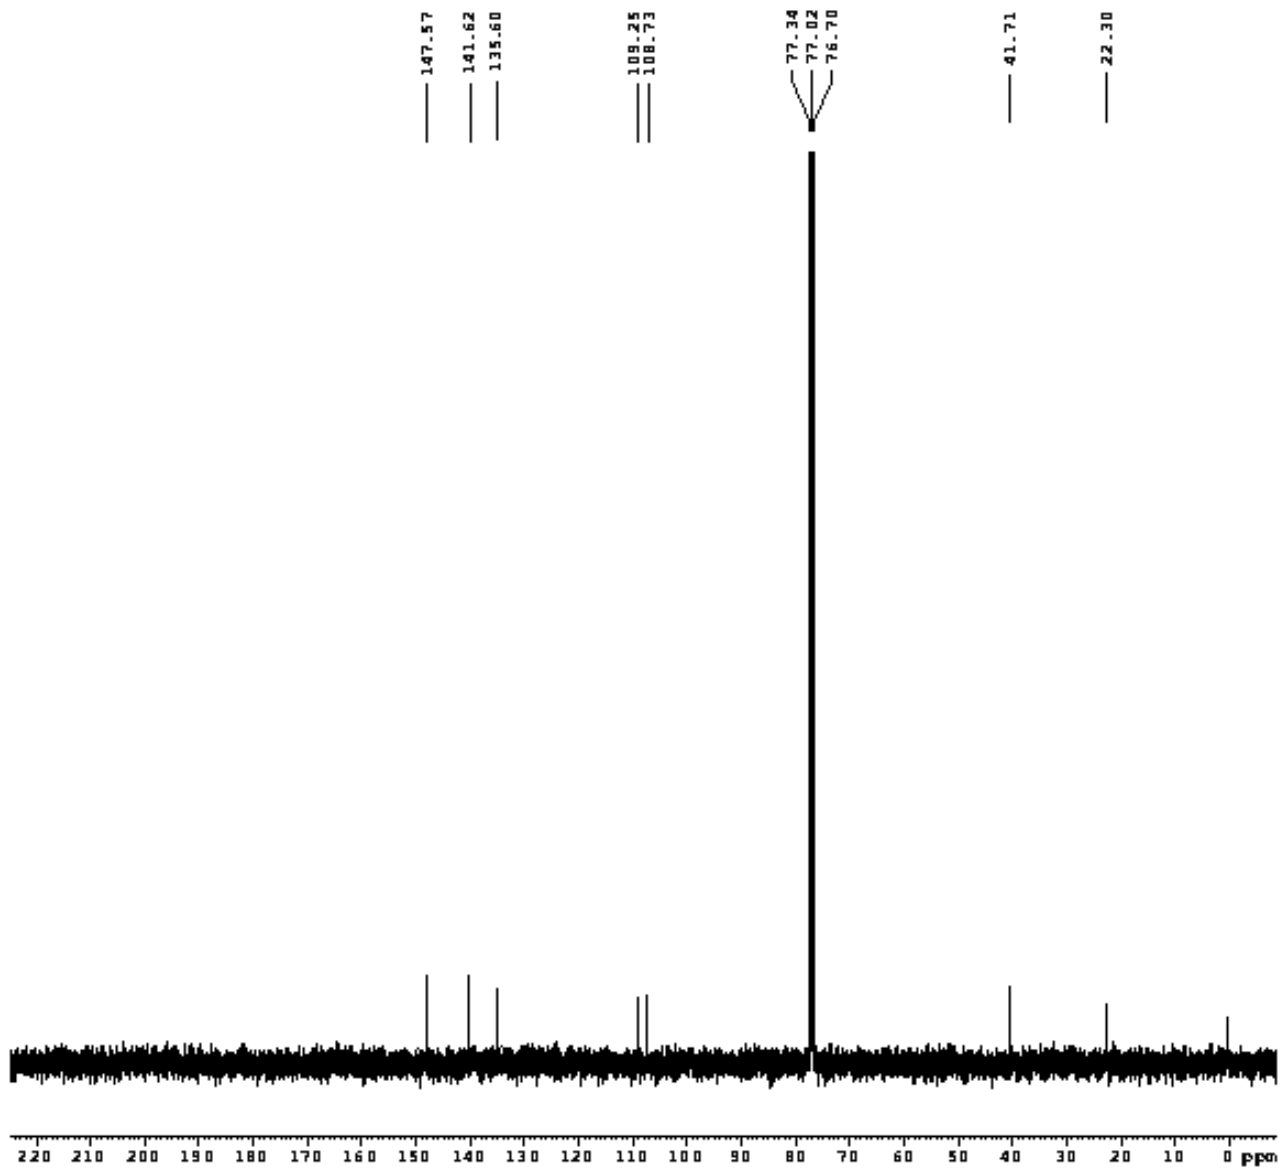

Compound 3f.  $^1\text{H}$  NMR Spectrum ( $\text{CDCl}_3$ ).

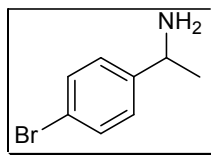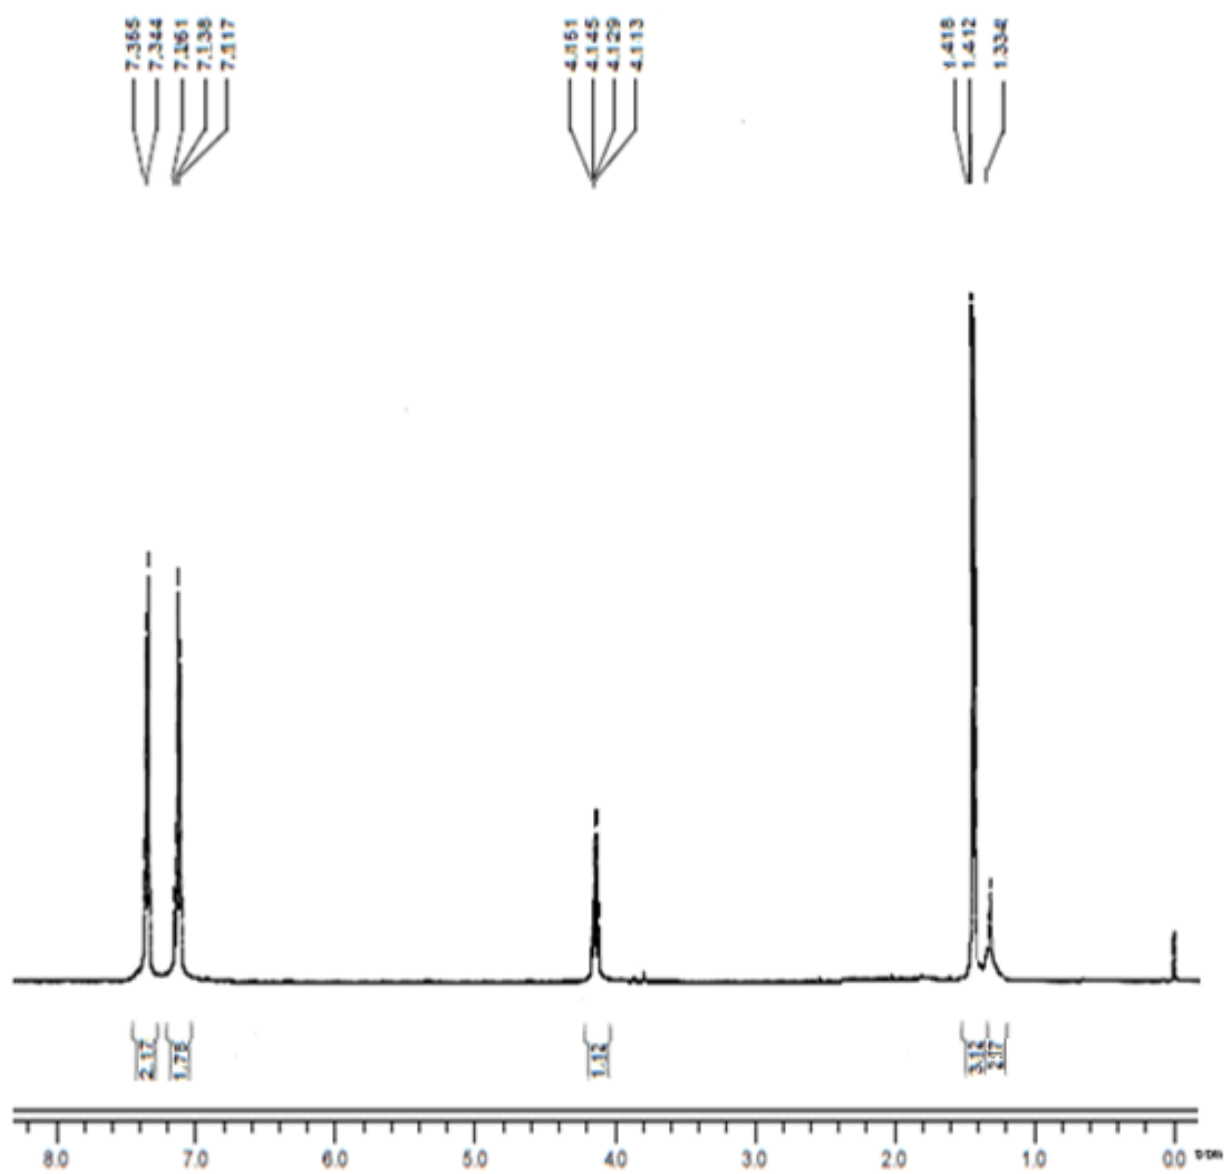

Compound 3f.  $^{13}\text{C}$  NMR Spectrum ( $\text{CDCl}_3$ ).

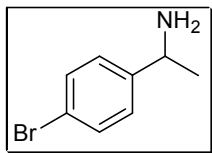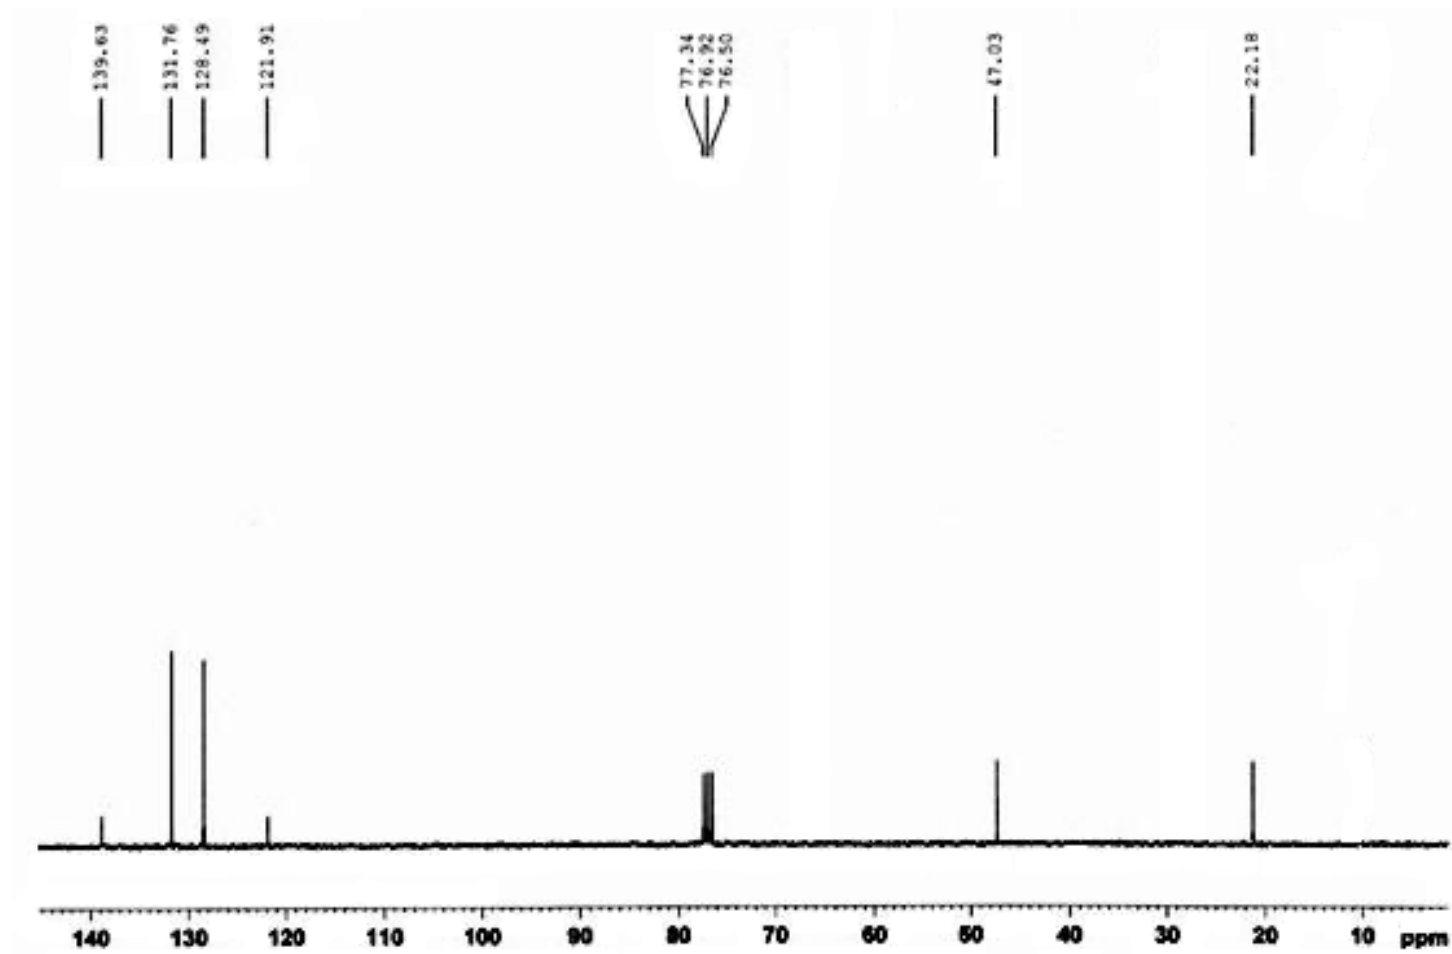

Compound 3g.  $^1\text{H}$  NMR Spectrum ( $\text{CDCl}_3$ ).

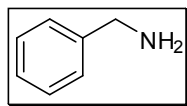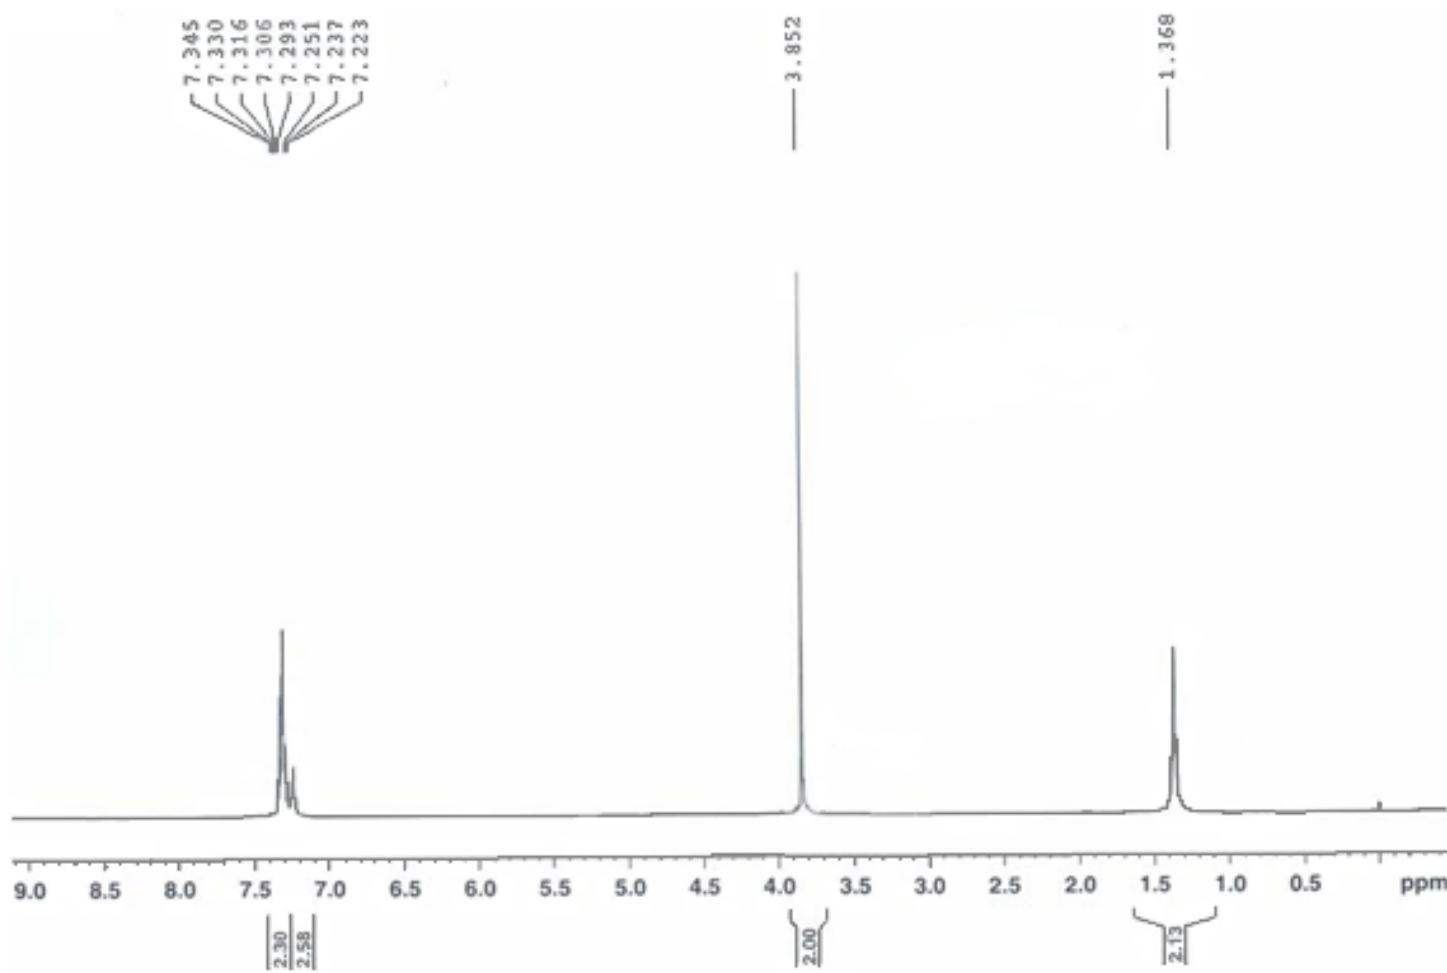

Compound 3g.  $^{13}\text{C}$  NMR Spectrum ( $\text{CDCl}_3$ ).

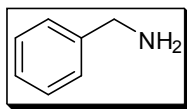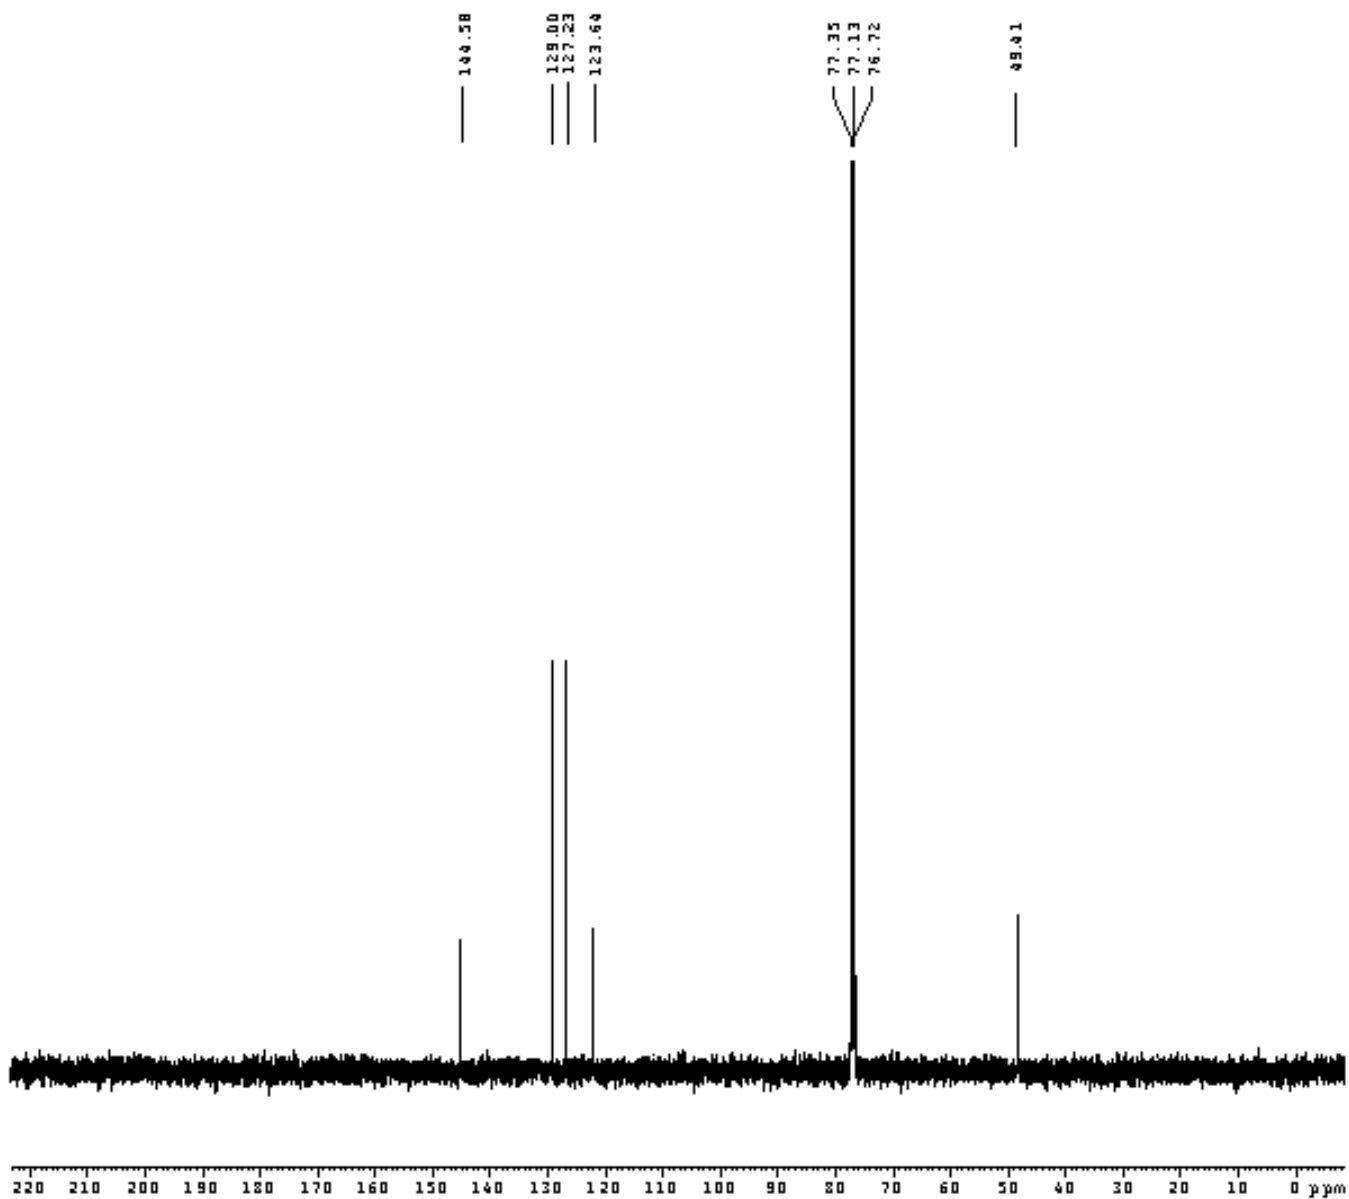

Compound 3h.  $^1\text{H}$  NMR Spectrum ( $\text{CDCl}_3$ ).

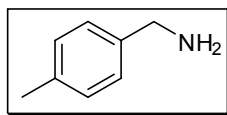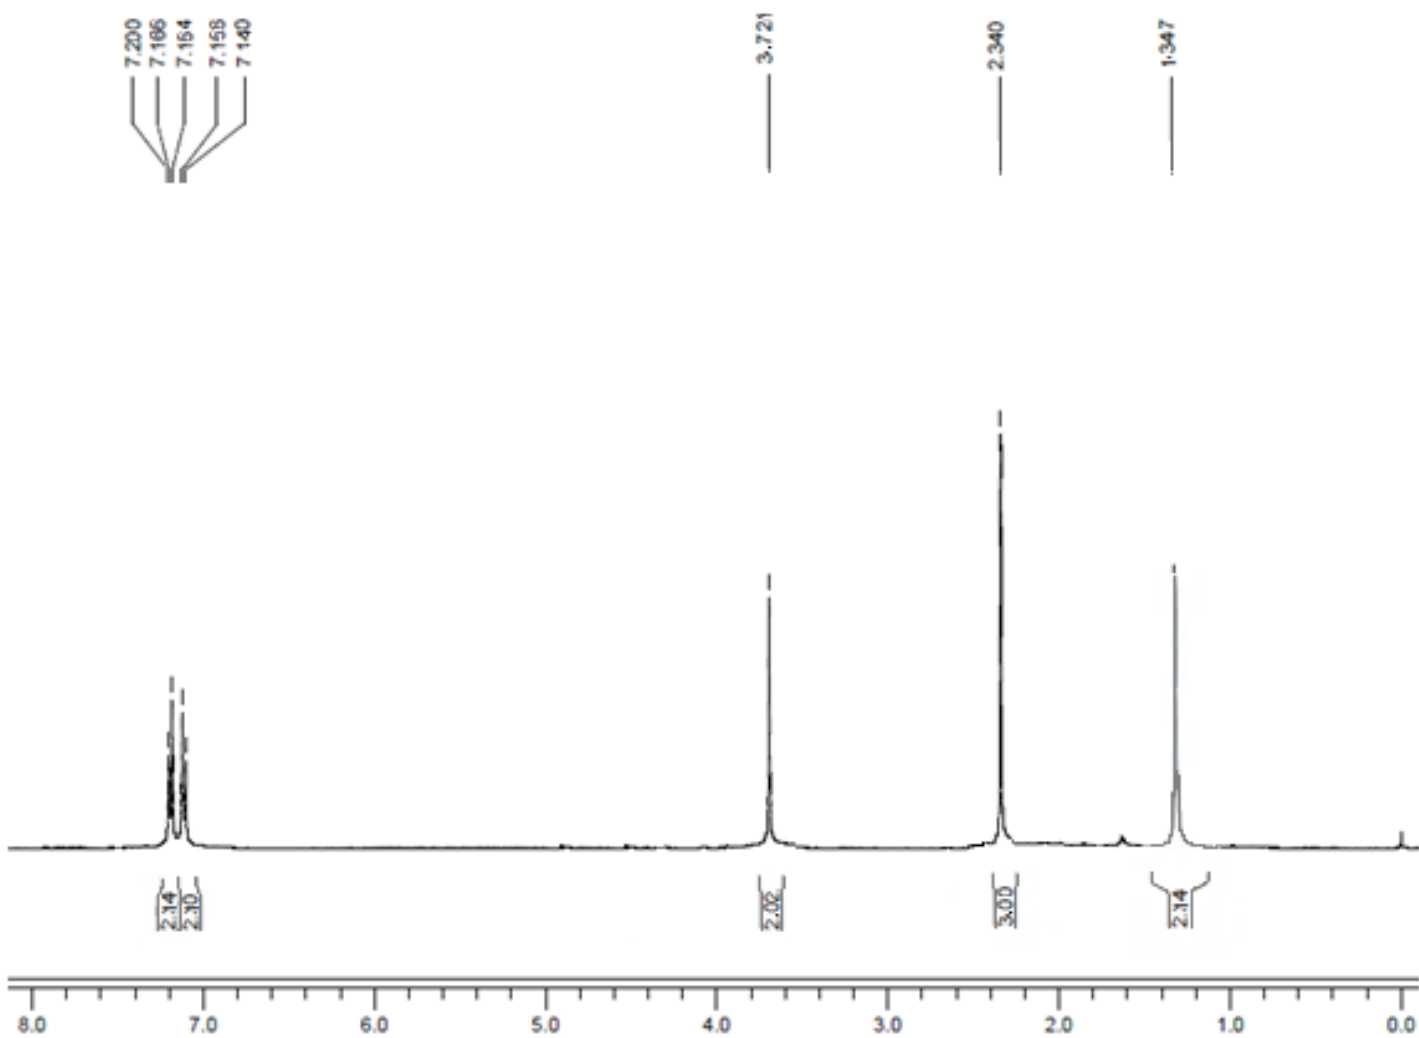

Compound 3h.  $^{13}\text{C}$  NMR Spectrum ( $\text{CDCl}_3$ ).

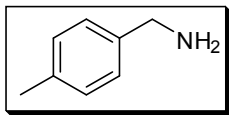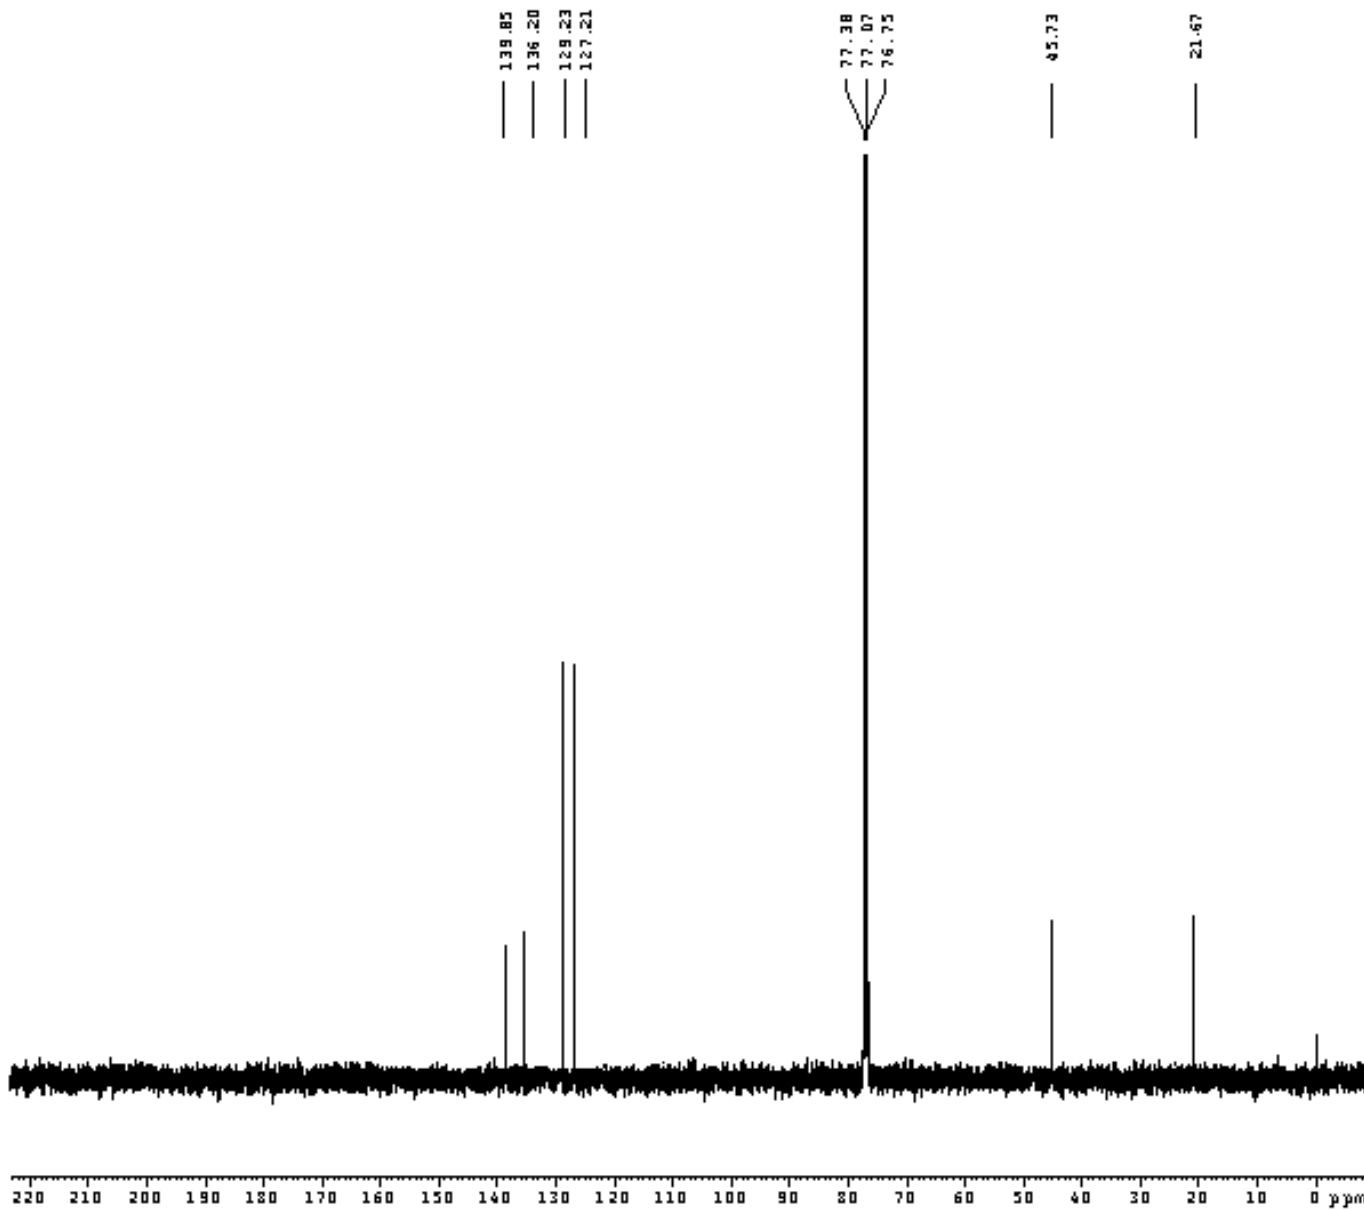

**Compound 3i.**  $^1\text{H}$  NMR Spectrum ( $\text{CDCl}_3$ ).

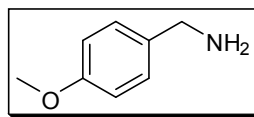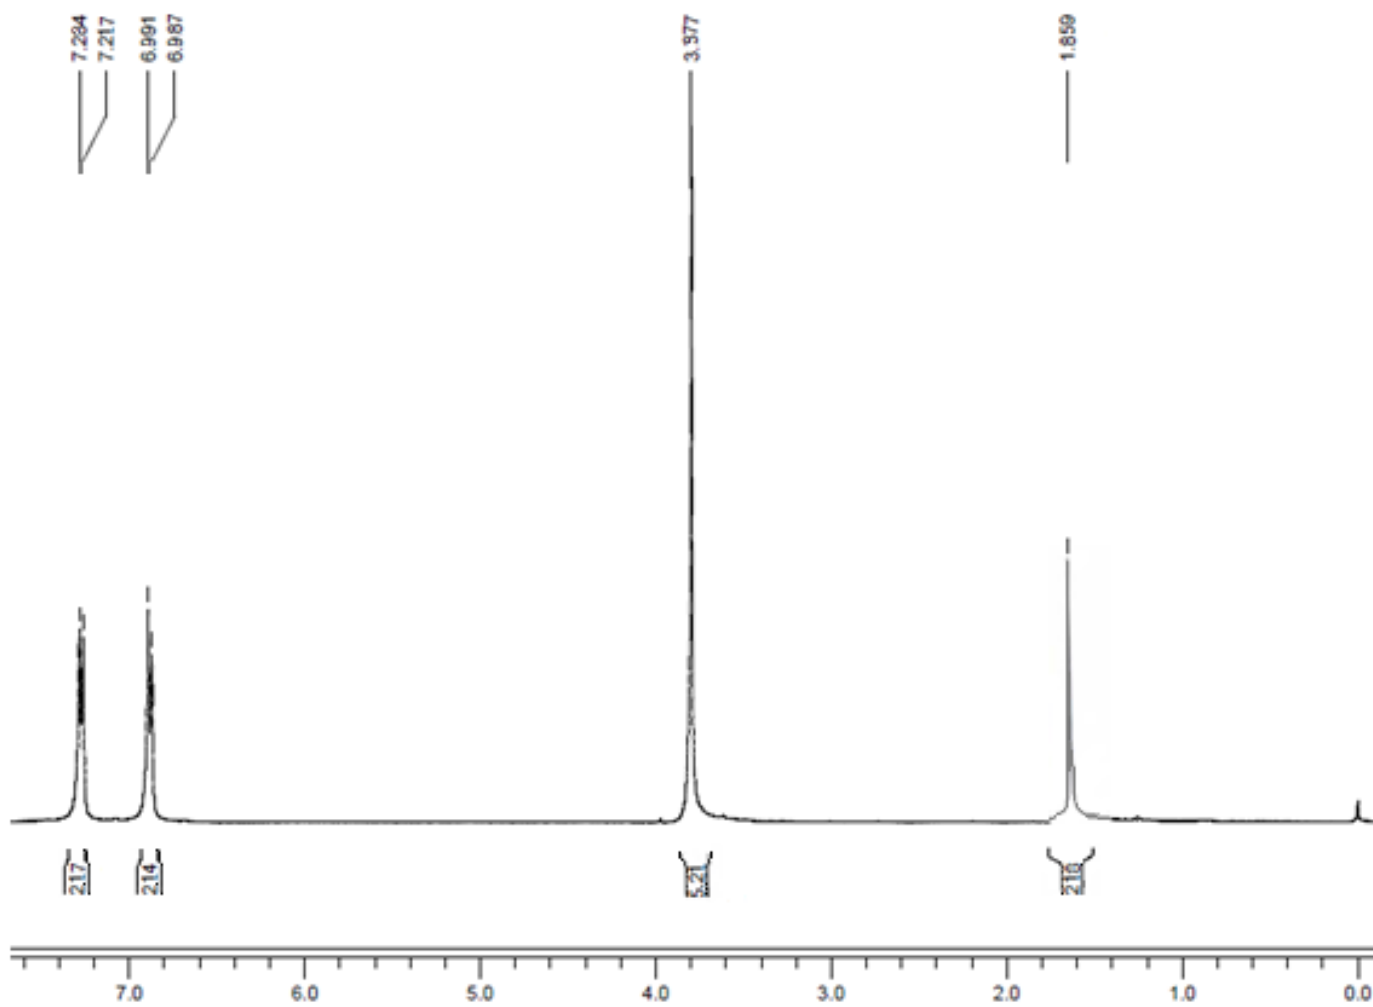



Compound 3i.  $^{13}\text{C}$  NMR Spectrum ( $\text{CDCl}_3$ ).

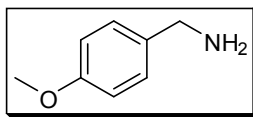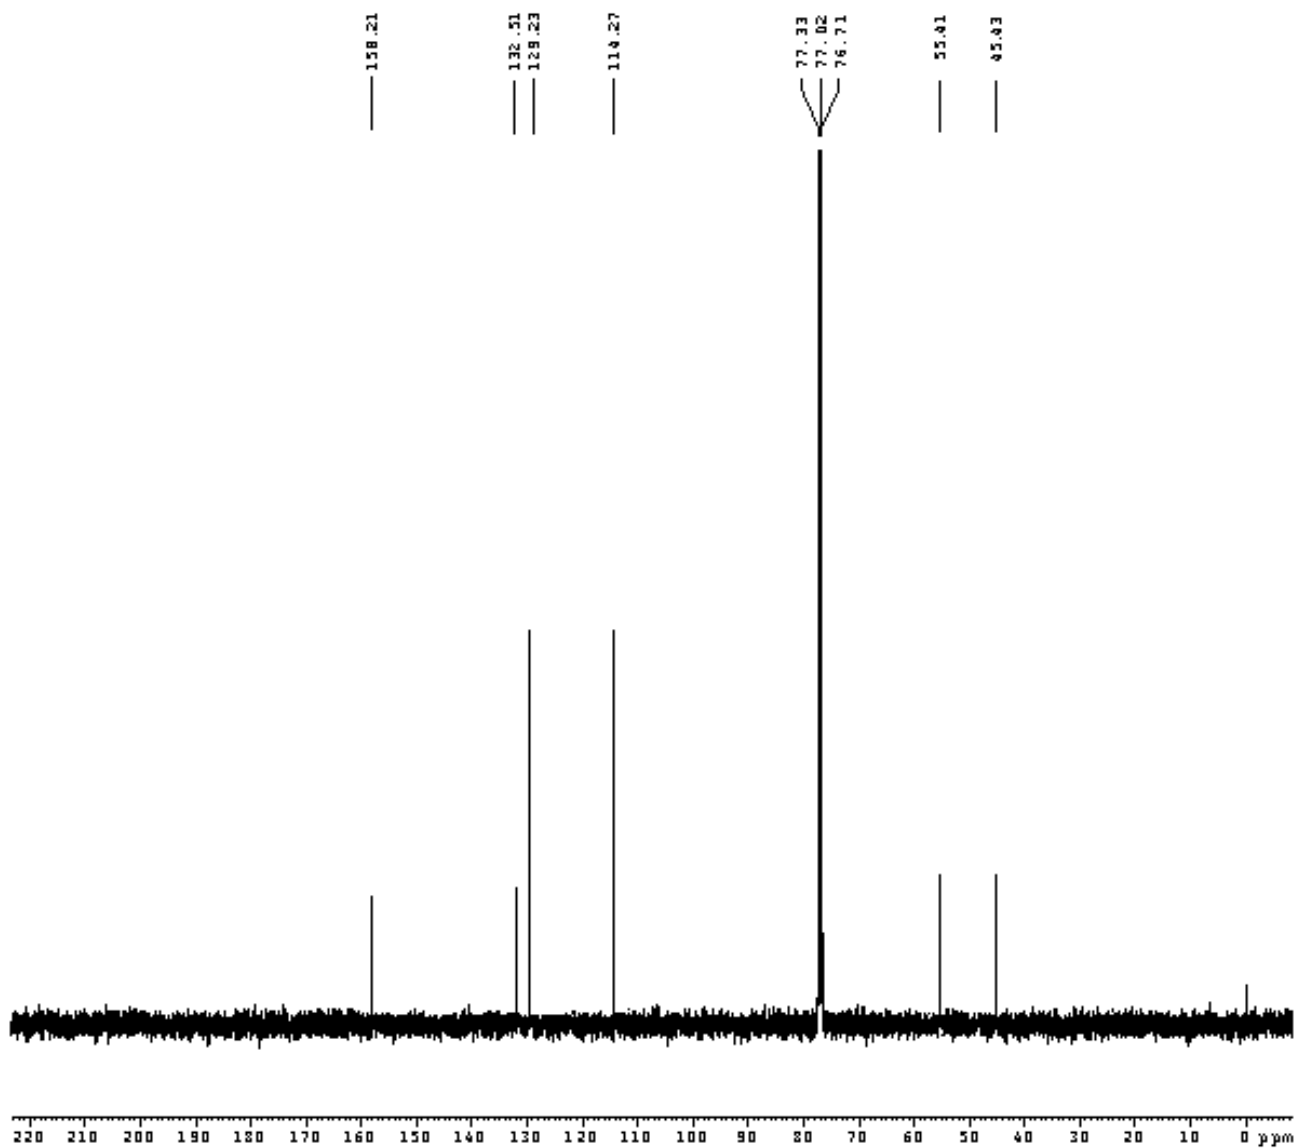

Compound 3j.  $^1\text{H}$  NMR Spectrum ( $\text{CDCl}_3$ ).

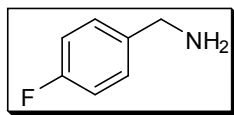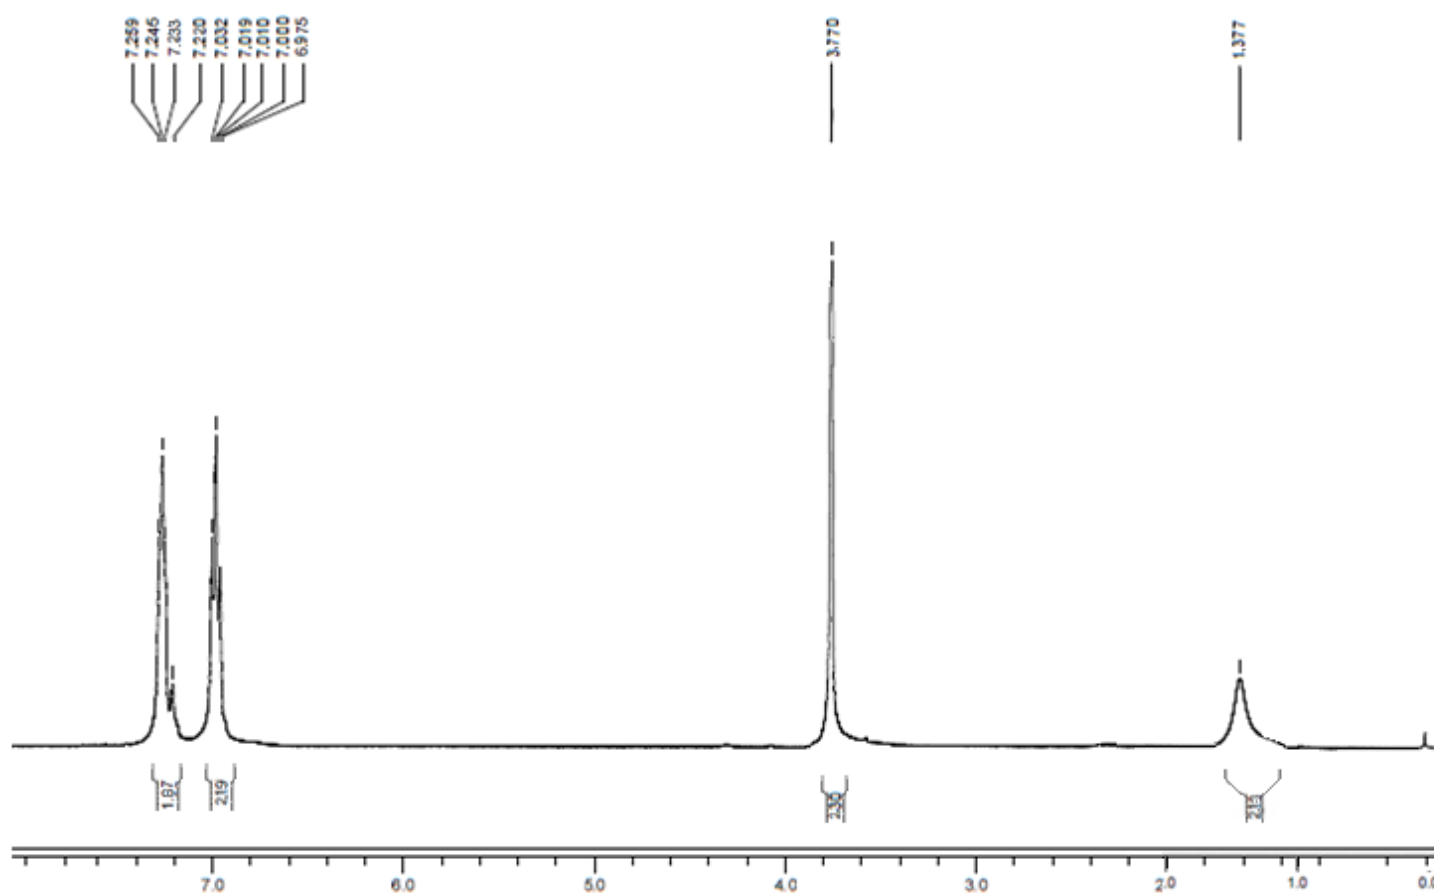

Compound 3j.  $^{13}\text{C}$  NMR Spectrum ( $\text{CDCl}_3$ ).

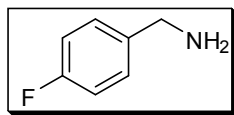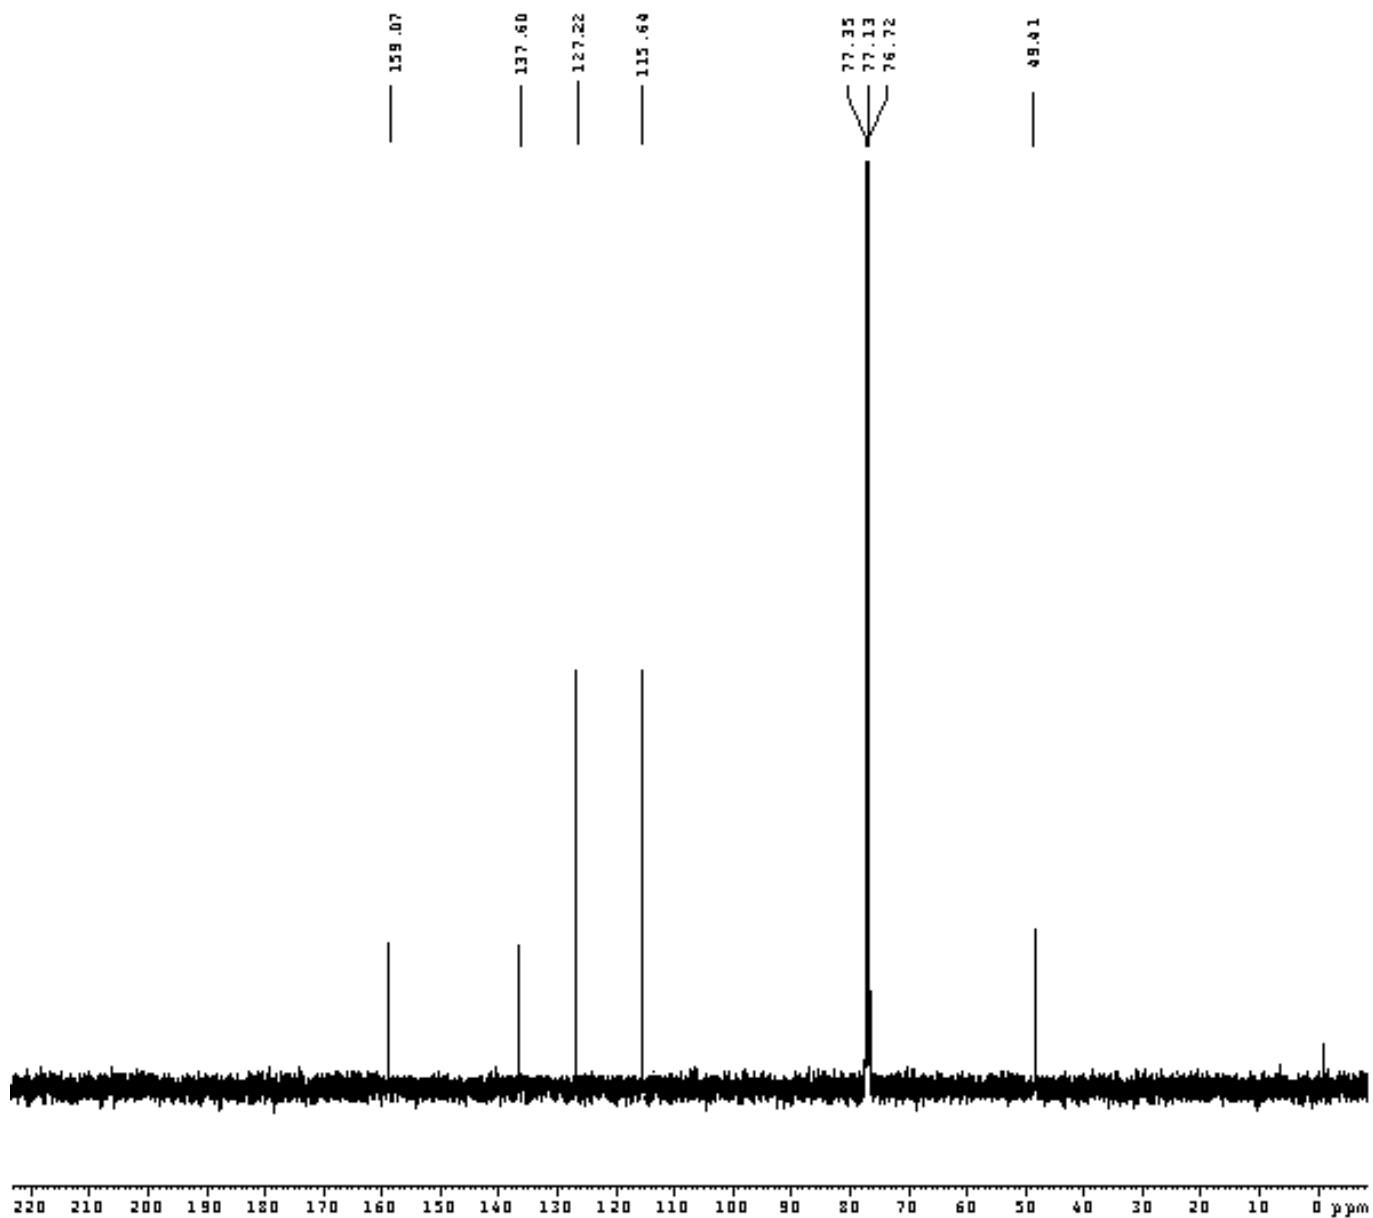

Compound 3k.  $^1\text{H}$  NMR Spectrum ( $\text{CDCl}_3$ ).

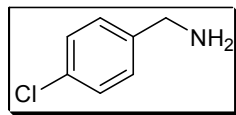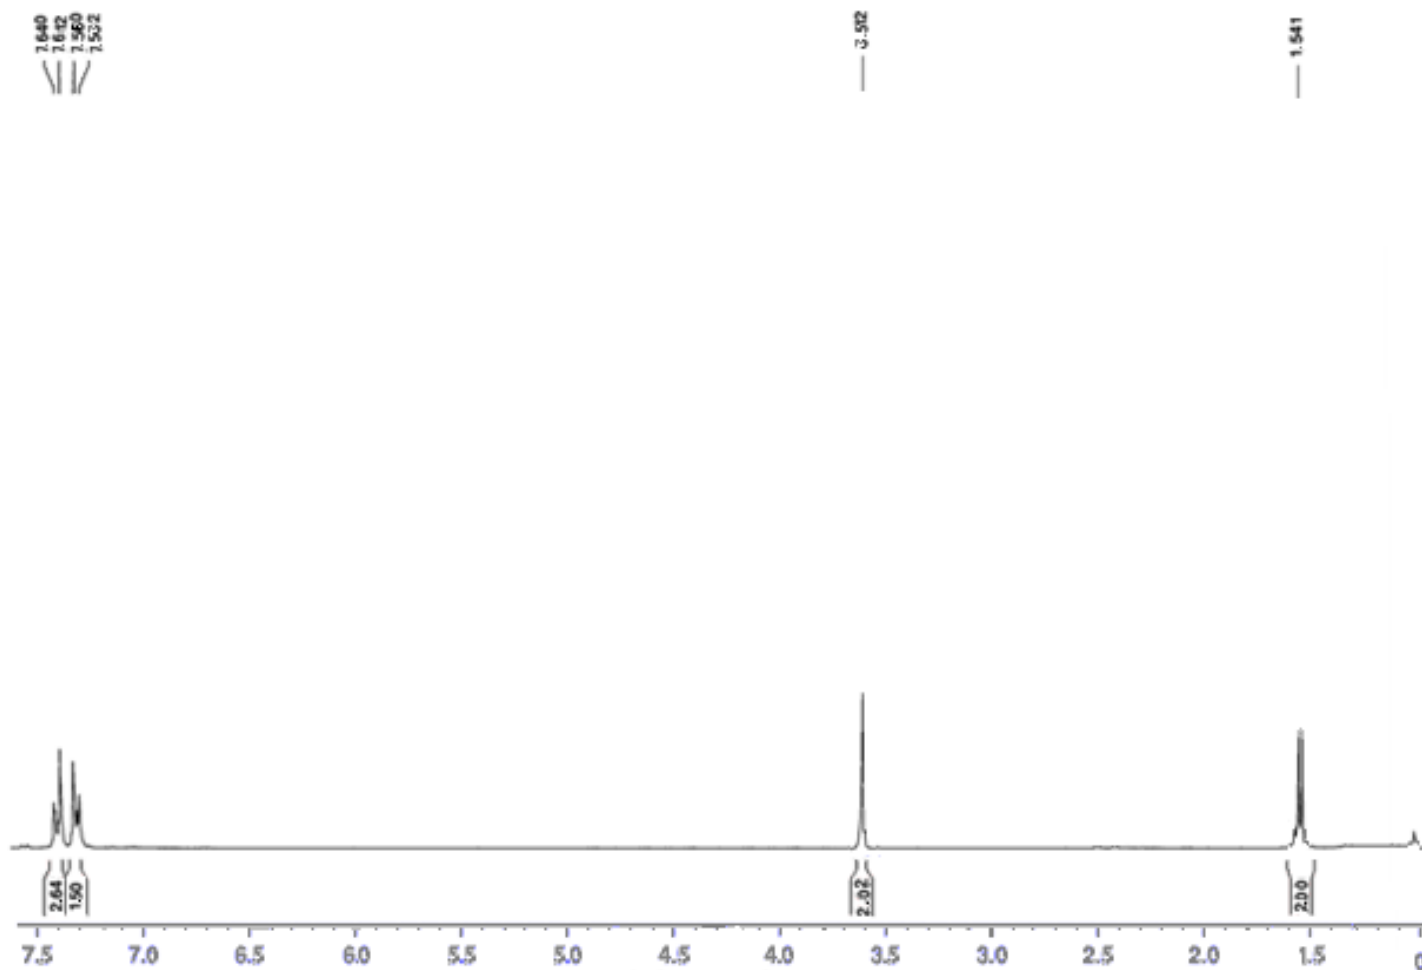

Compound 3k.  $^{13}\text{C}$  NMR Spectrum ( $\text{CDCl}_3$ ).

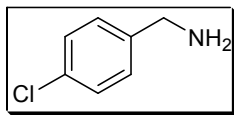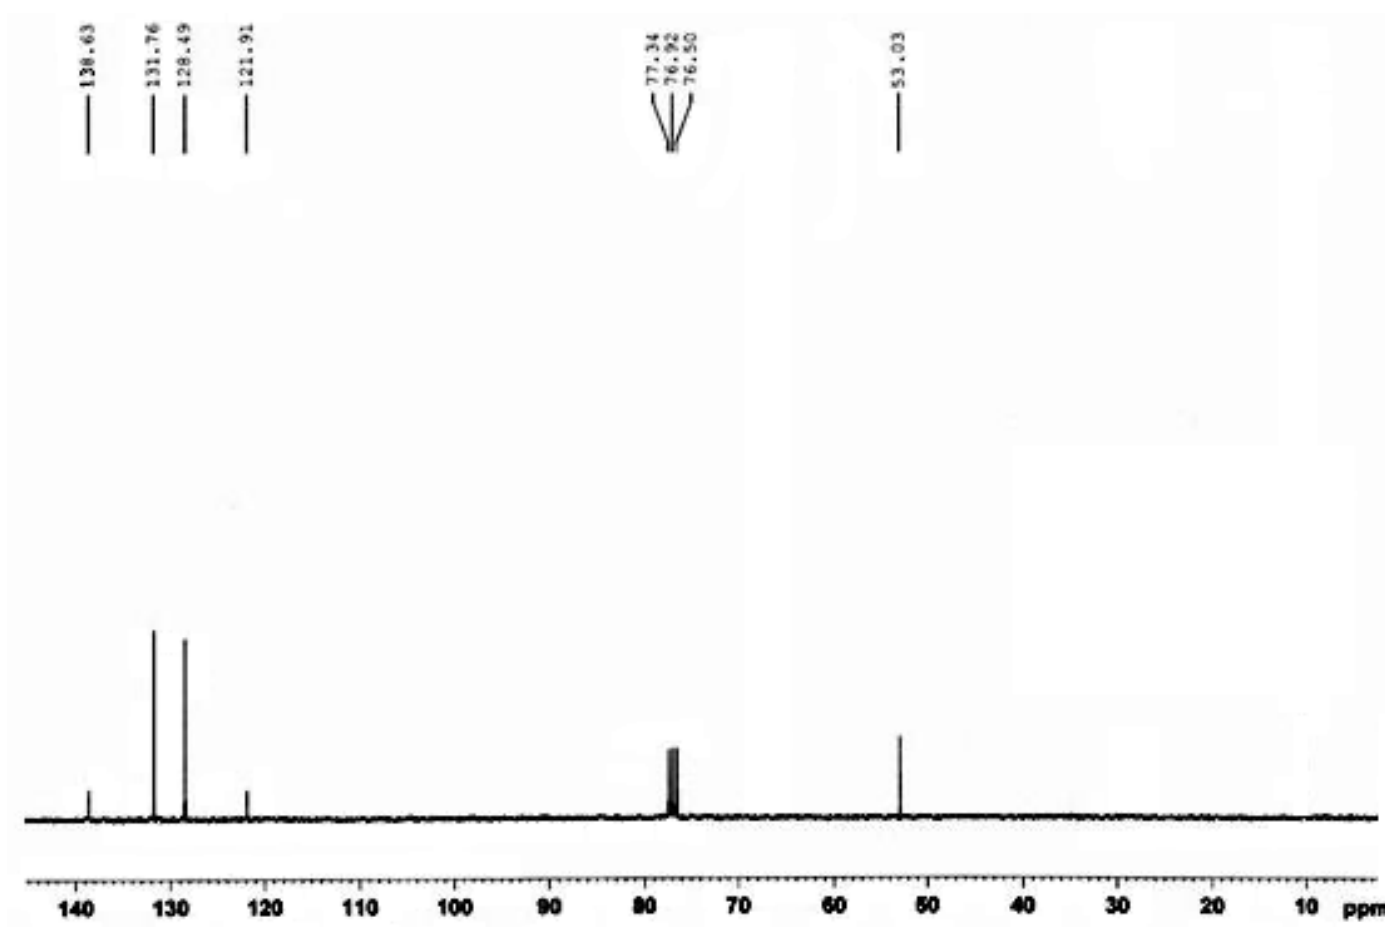

**Compound 3l.**  $^1\text{H}$  NMR Spectrum ( $\text{CDCl}_3$ ).

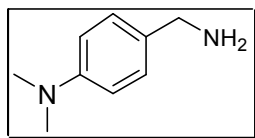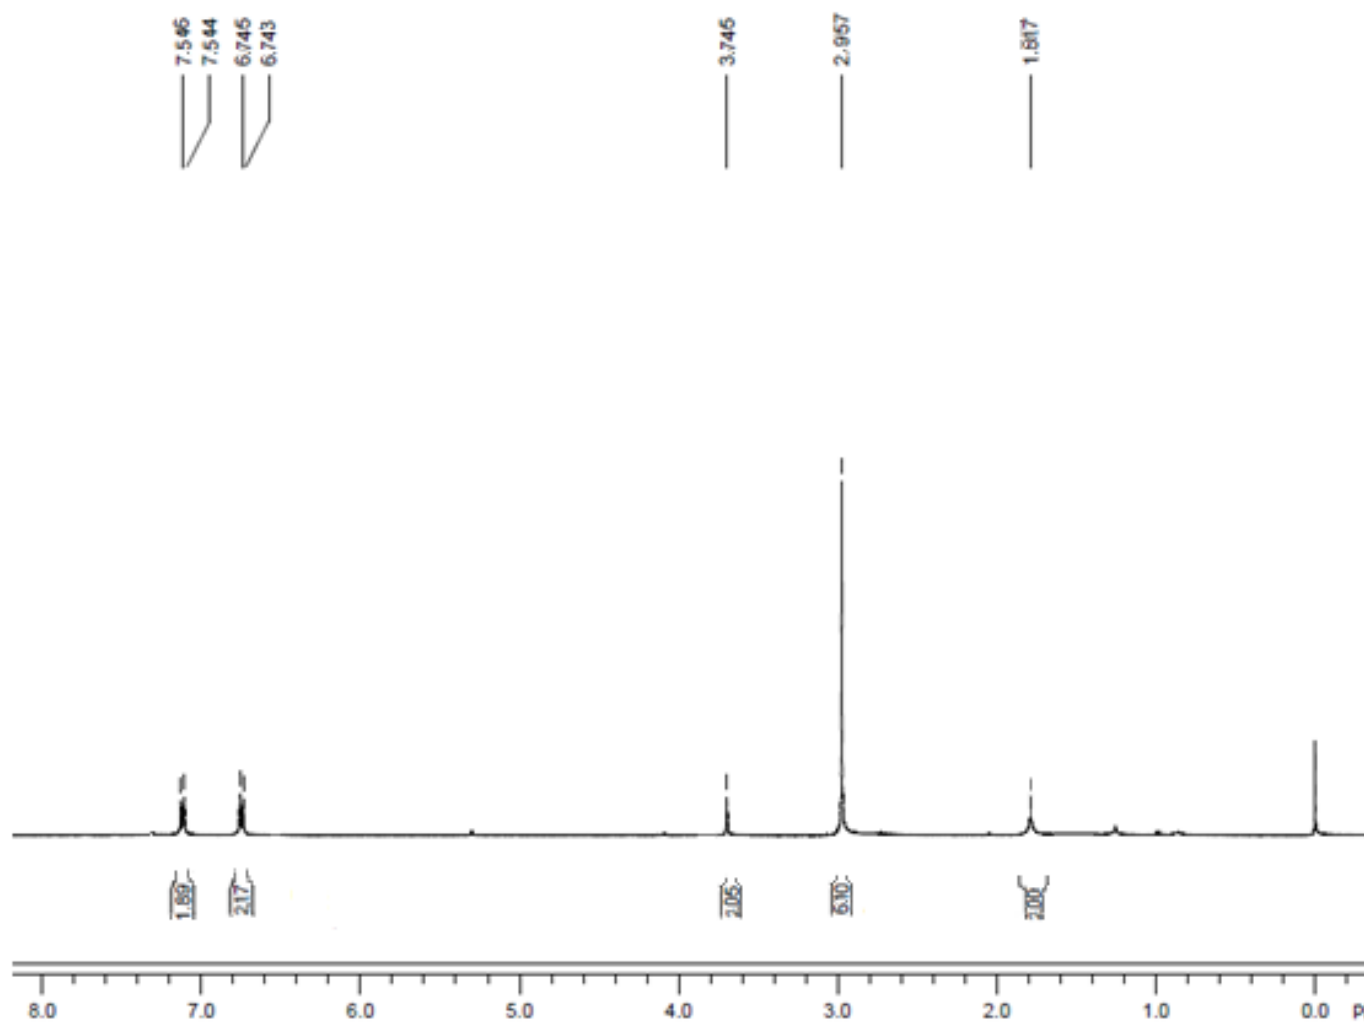

**Compound 3l.**  $^{13}\text{C}$  NMR Spectrum ( $\text{CDCl}_3$ ).

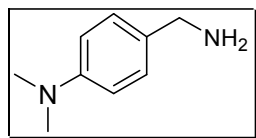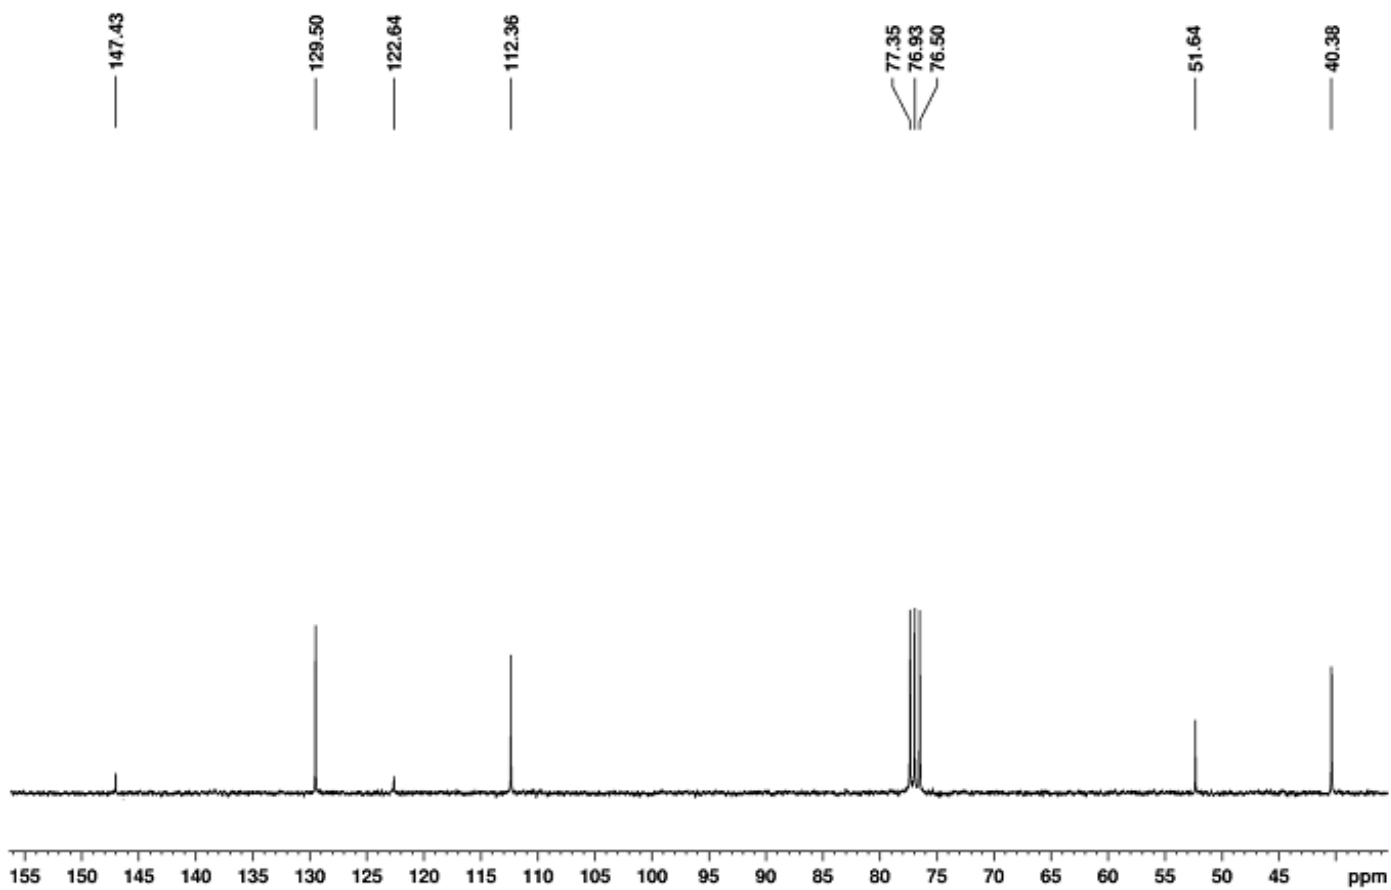

**Compound 3m.**  $^1\text{H}$  NMR Spectrum ( $\text{CDCl}_3$ ).

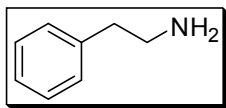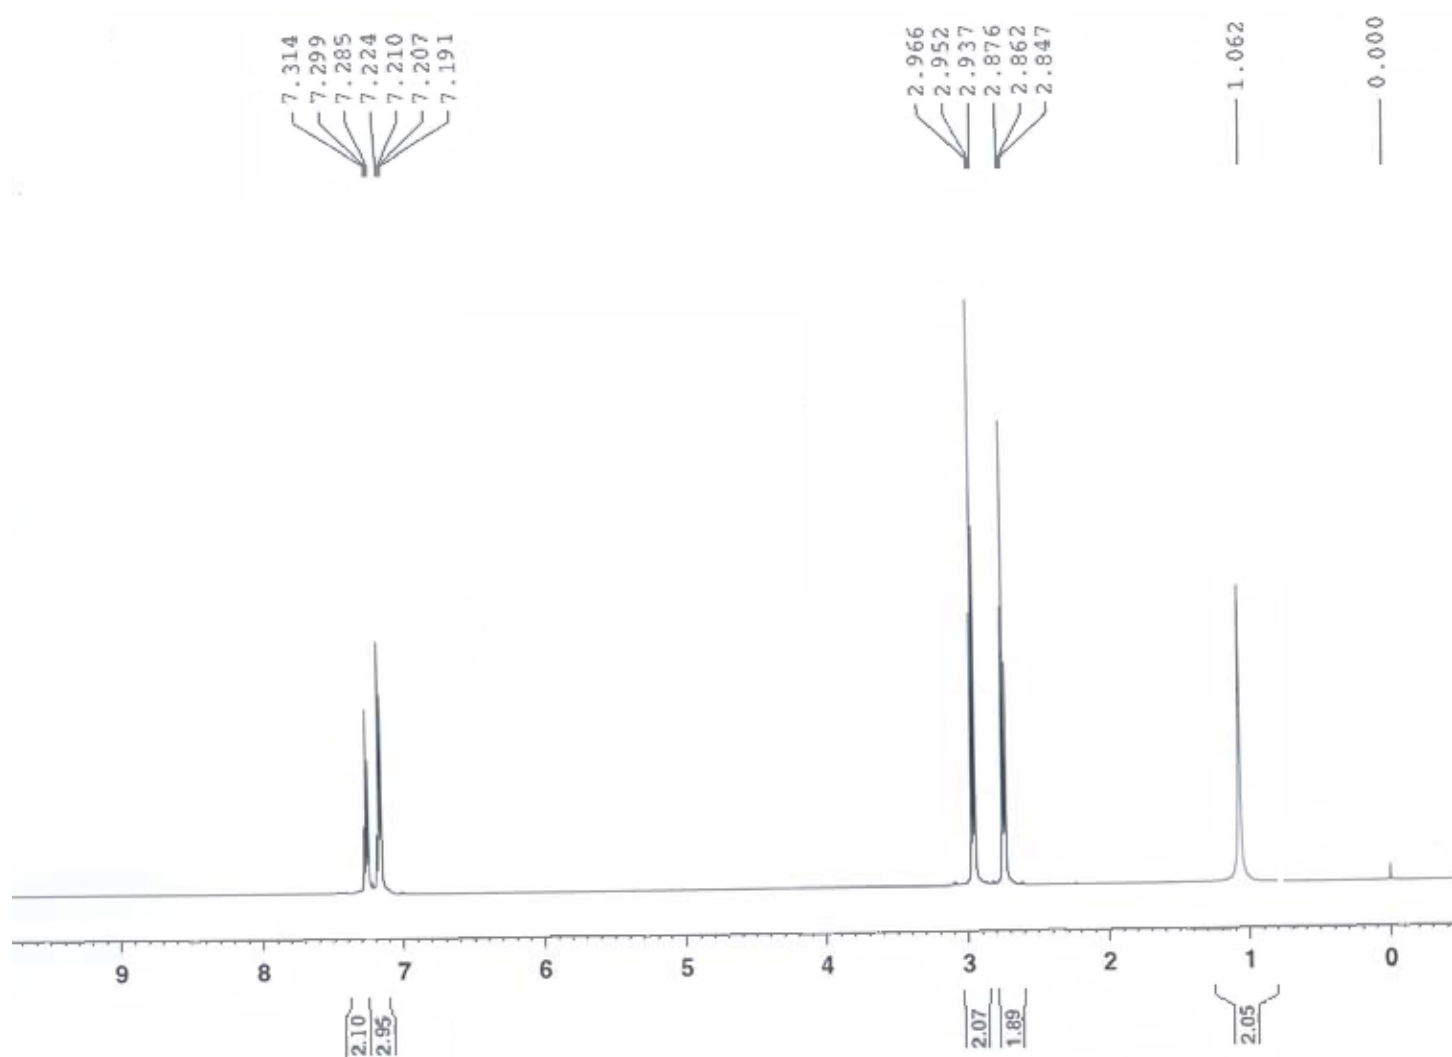



Compound 3m.  $^{13}\text{C}$  NMR Spectrum ( $\text{CDCl}_3$ ).

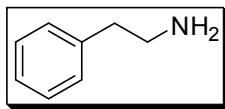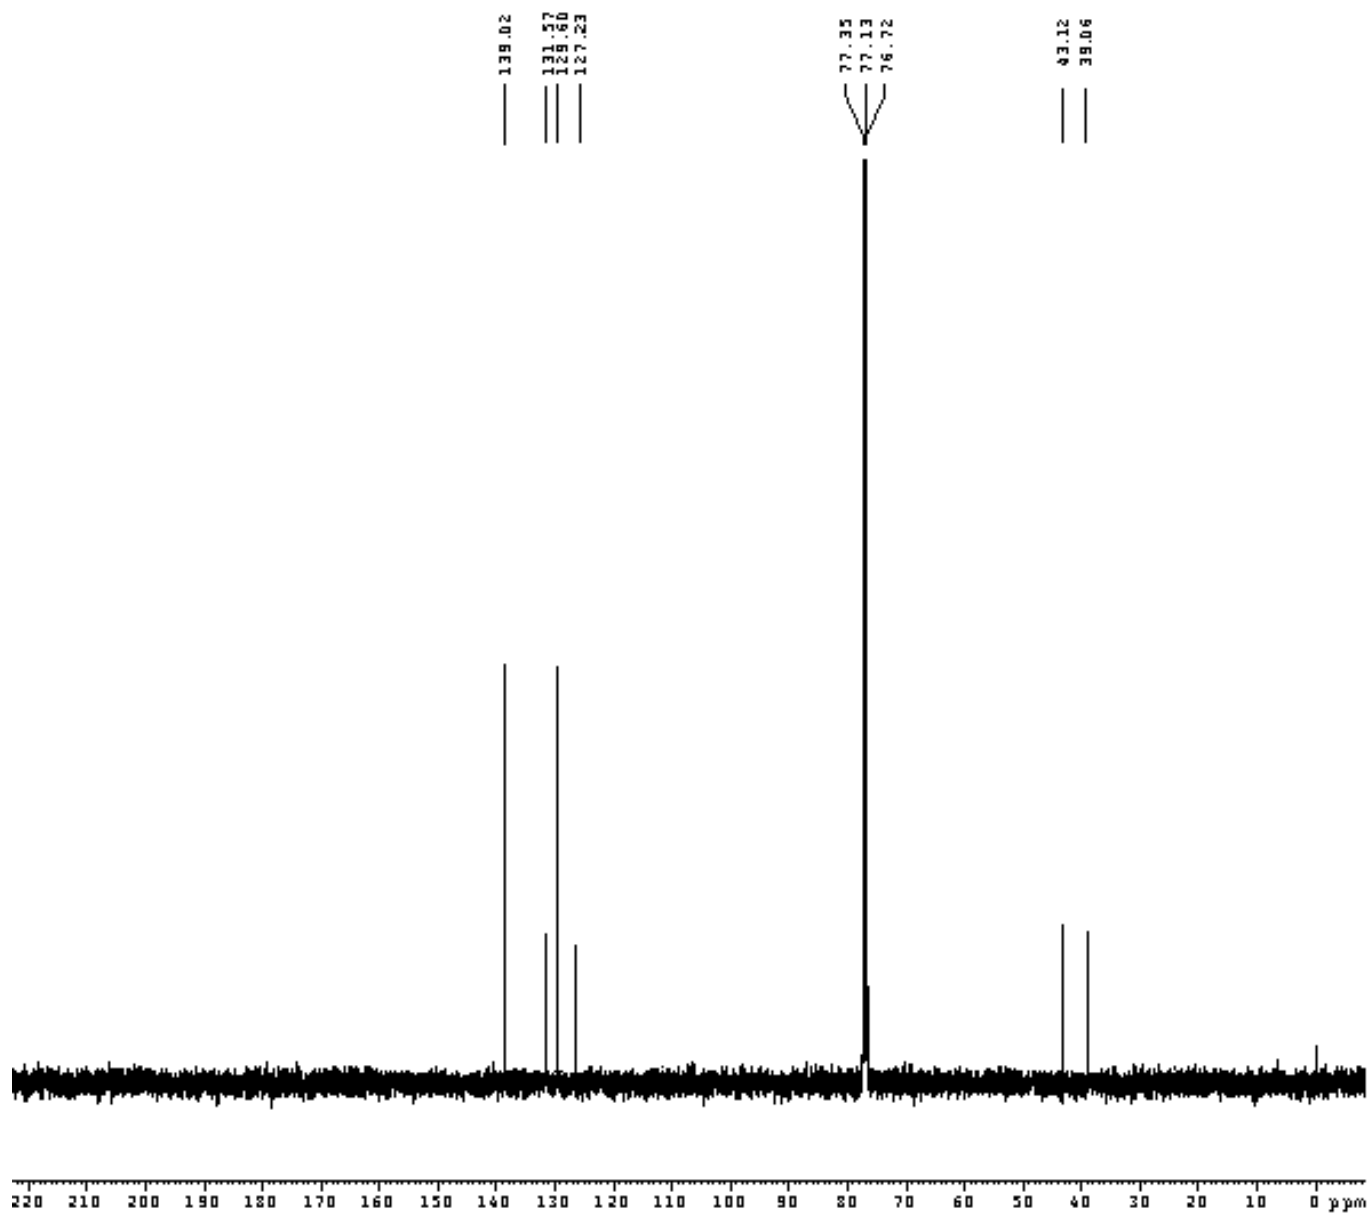

Compound 3n.  $^1\text{H}$  NMR Spectrum ( $\text{CDCl}_3$ ).

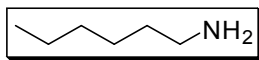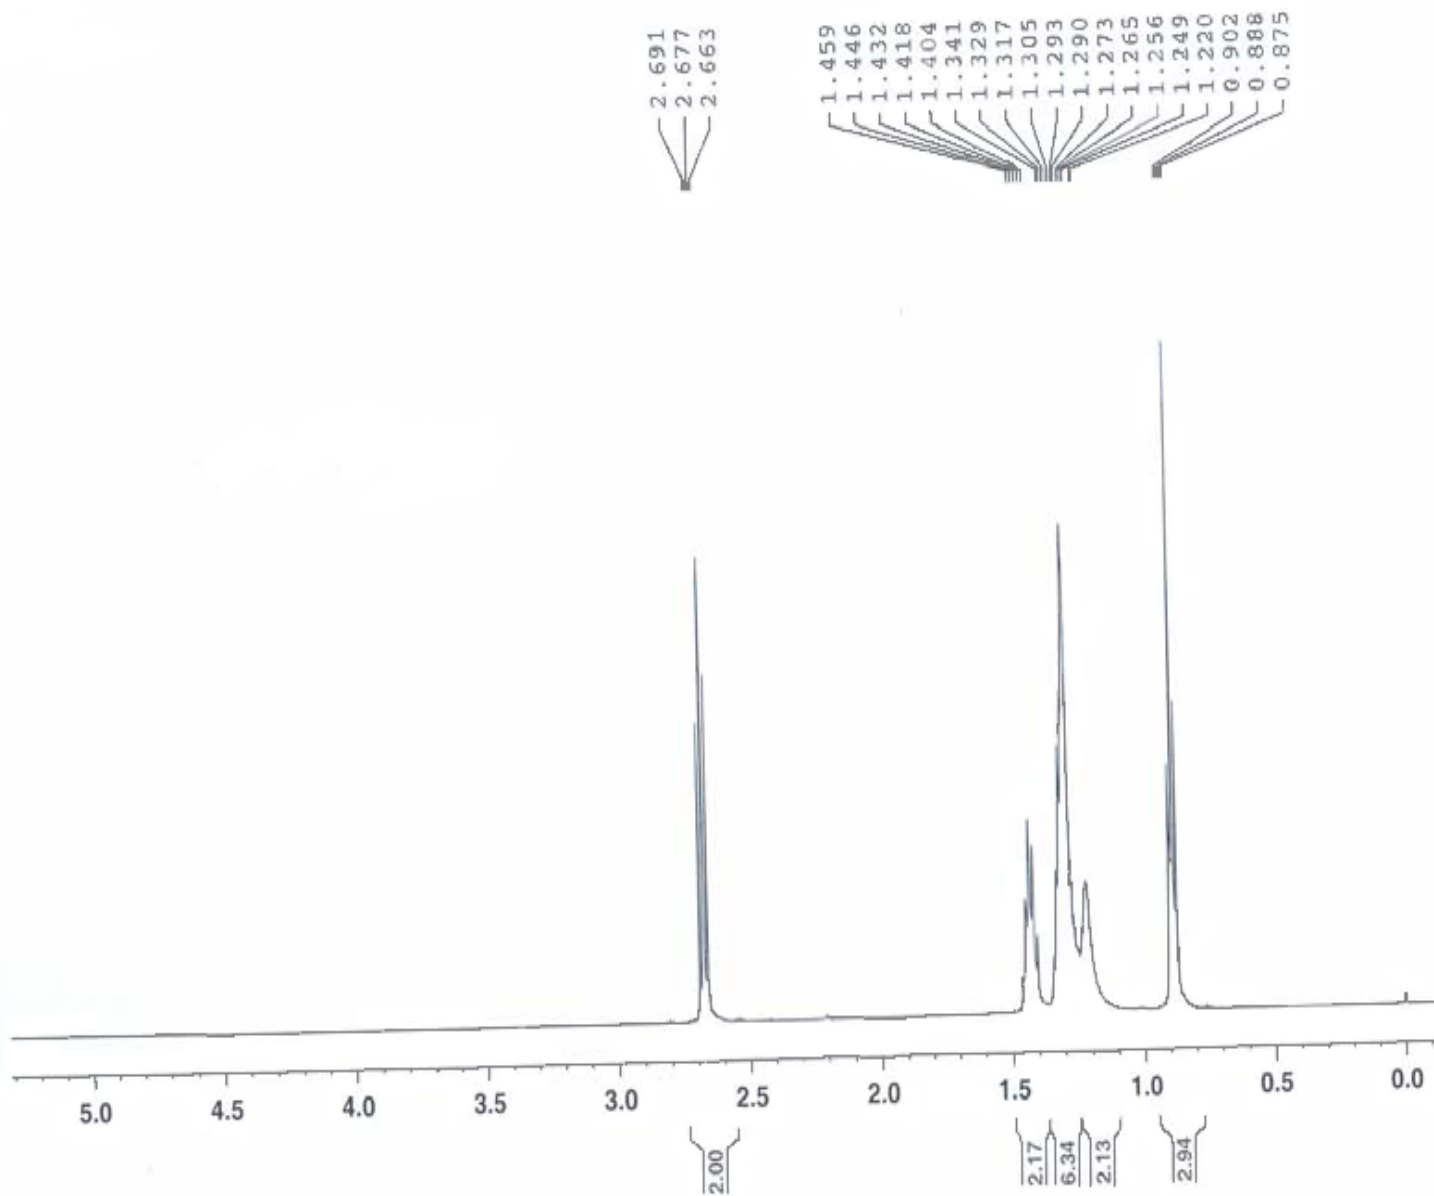

Compound 3n.  $^{13}\text{C}$  NMR Spectrum ( $\text{CDCl}_3$ ).

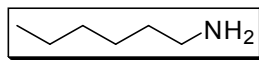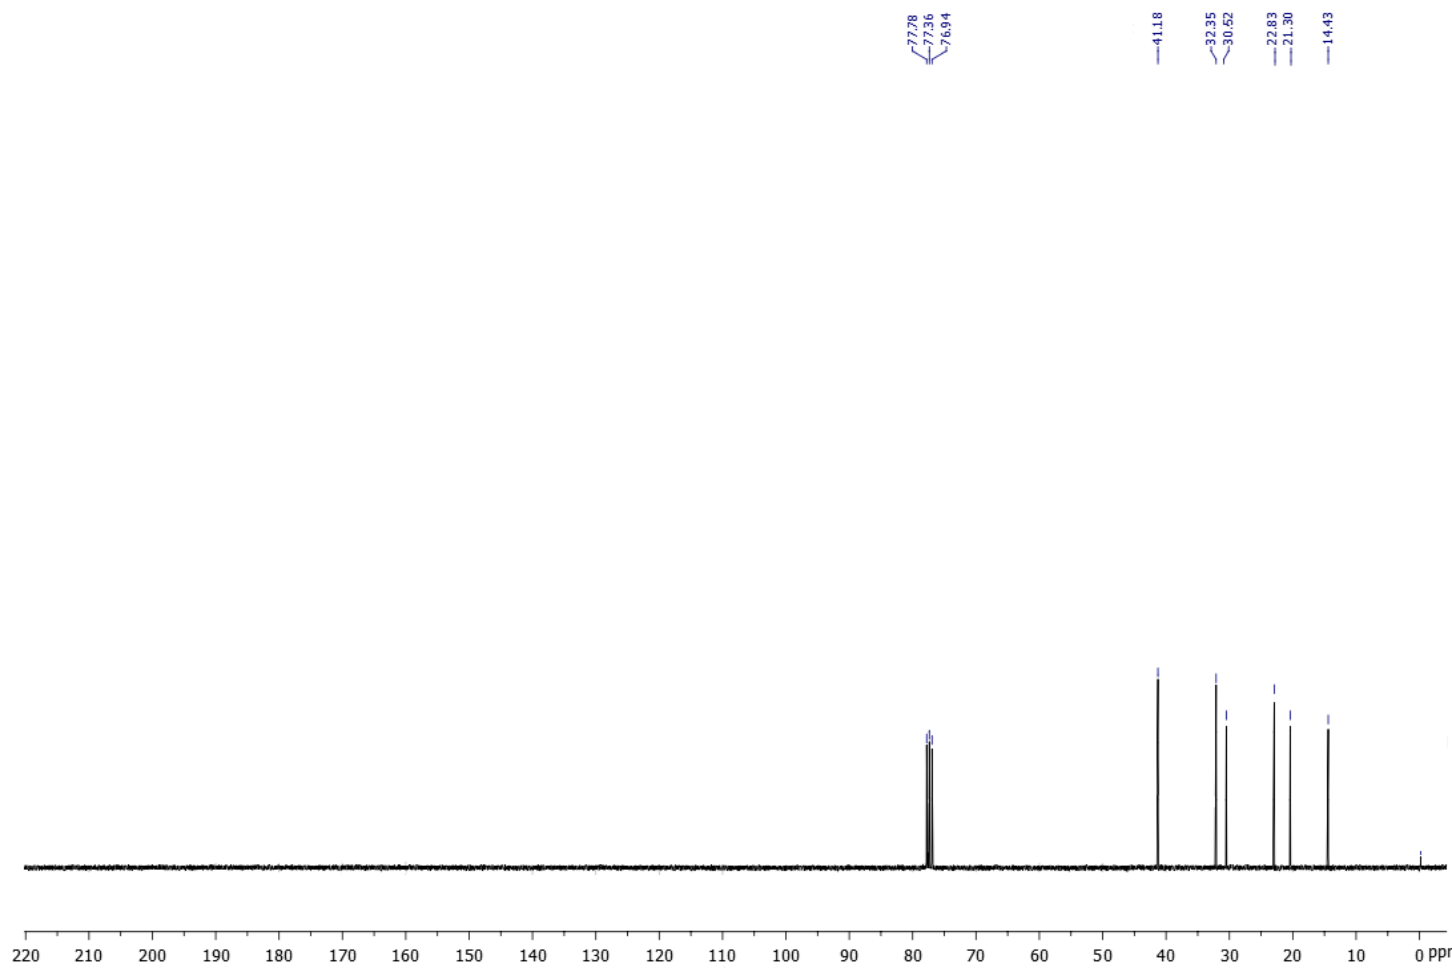

**Compound 30.**  $^1\text{H}$  NMR Spectrum ( $\text{CDCl}_3$ ).

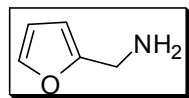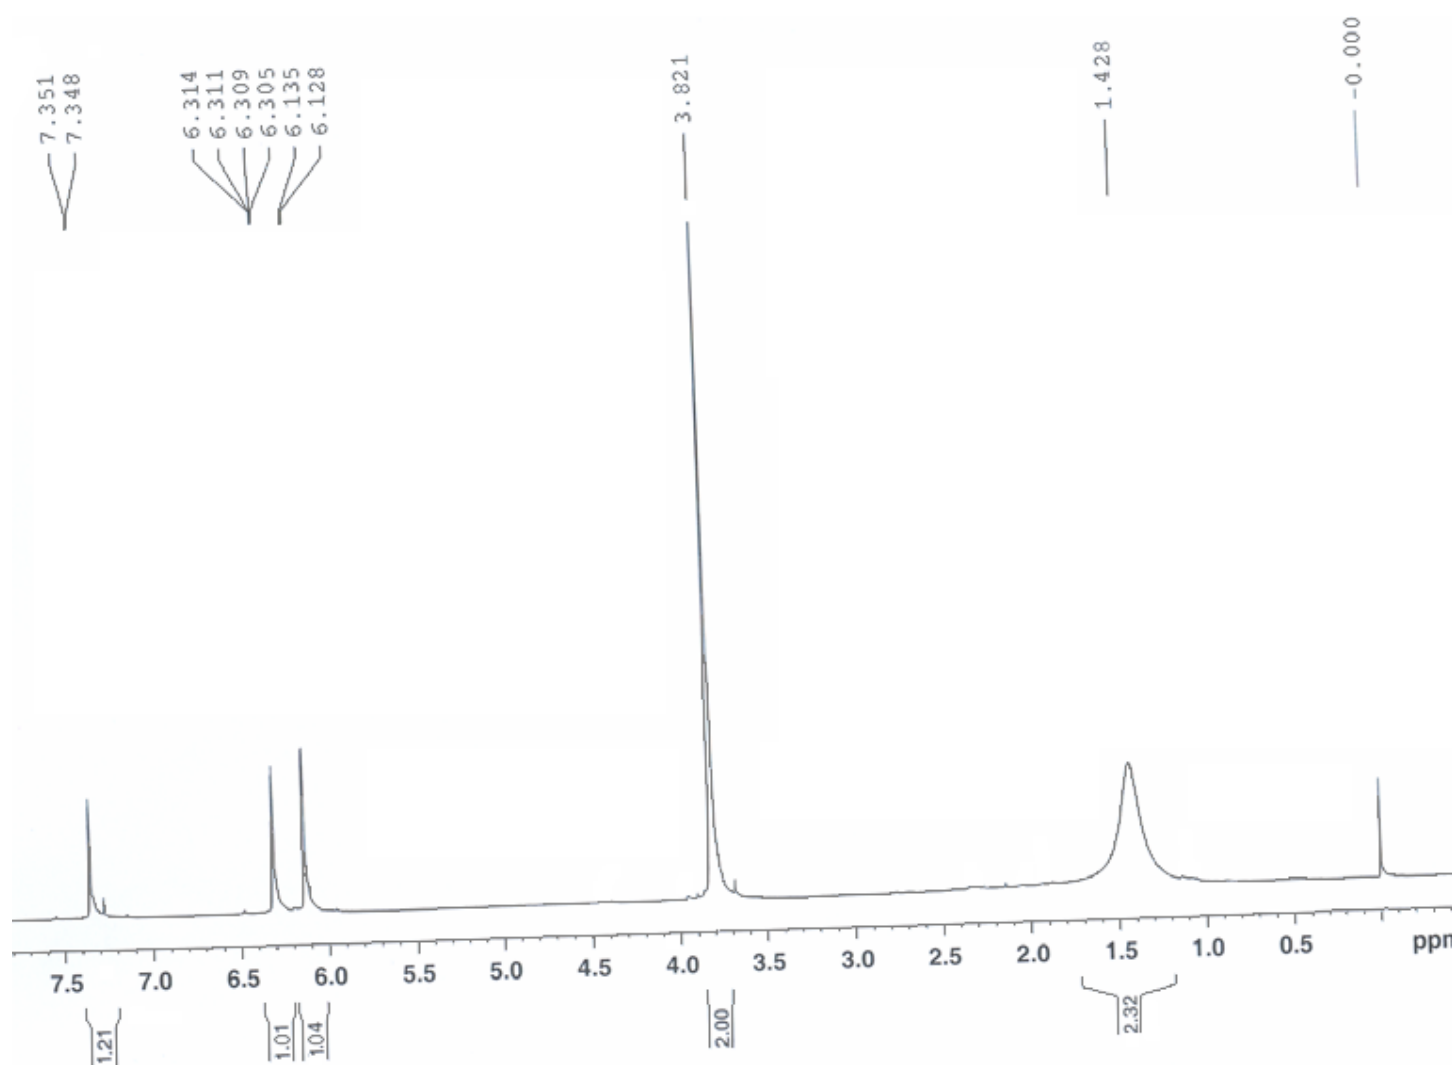

**Compound 3o.**  $^{13}\text{C}$  NMR Spectrum ( $\text{CDCl}_3$ ).

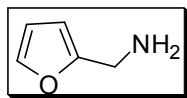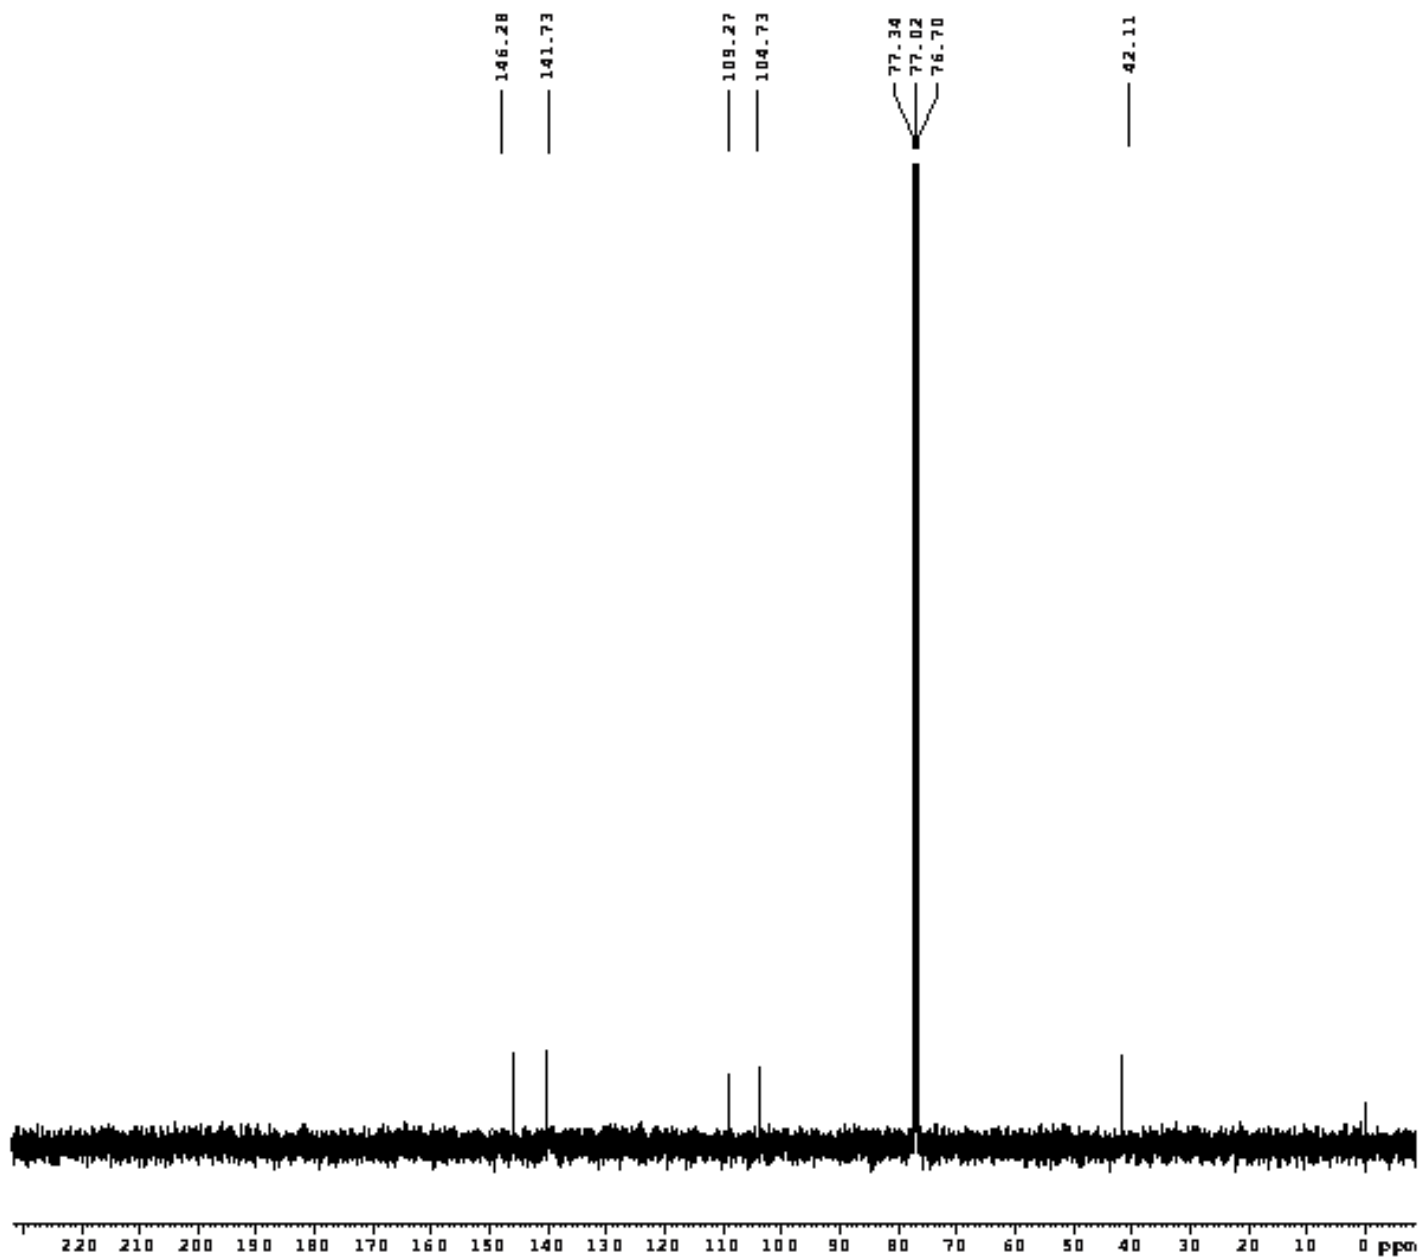

**Compound 3p.**  $^1\text{H}$  NMR Spectrum ( $\text{CDCl}_3$ ).

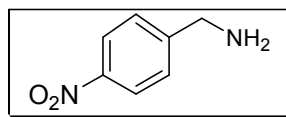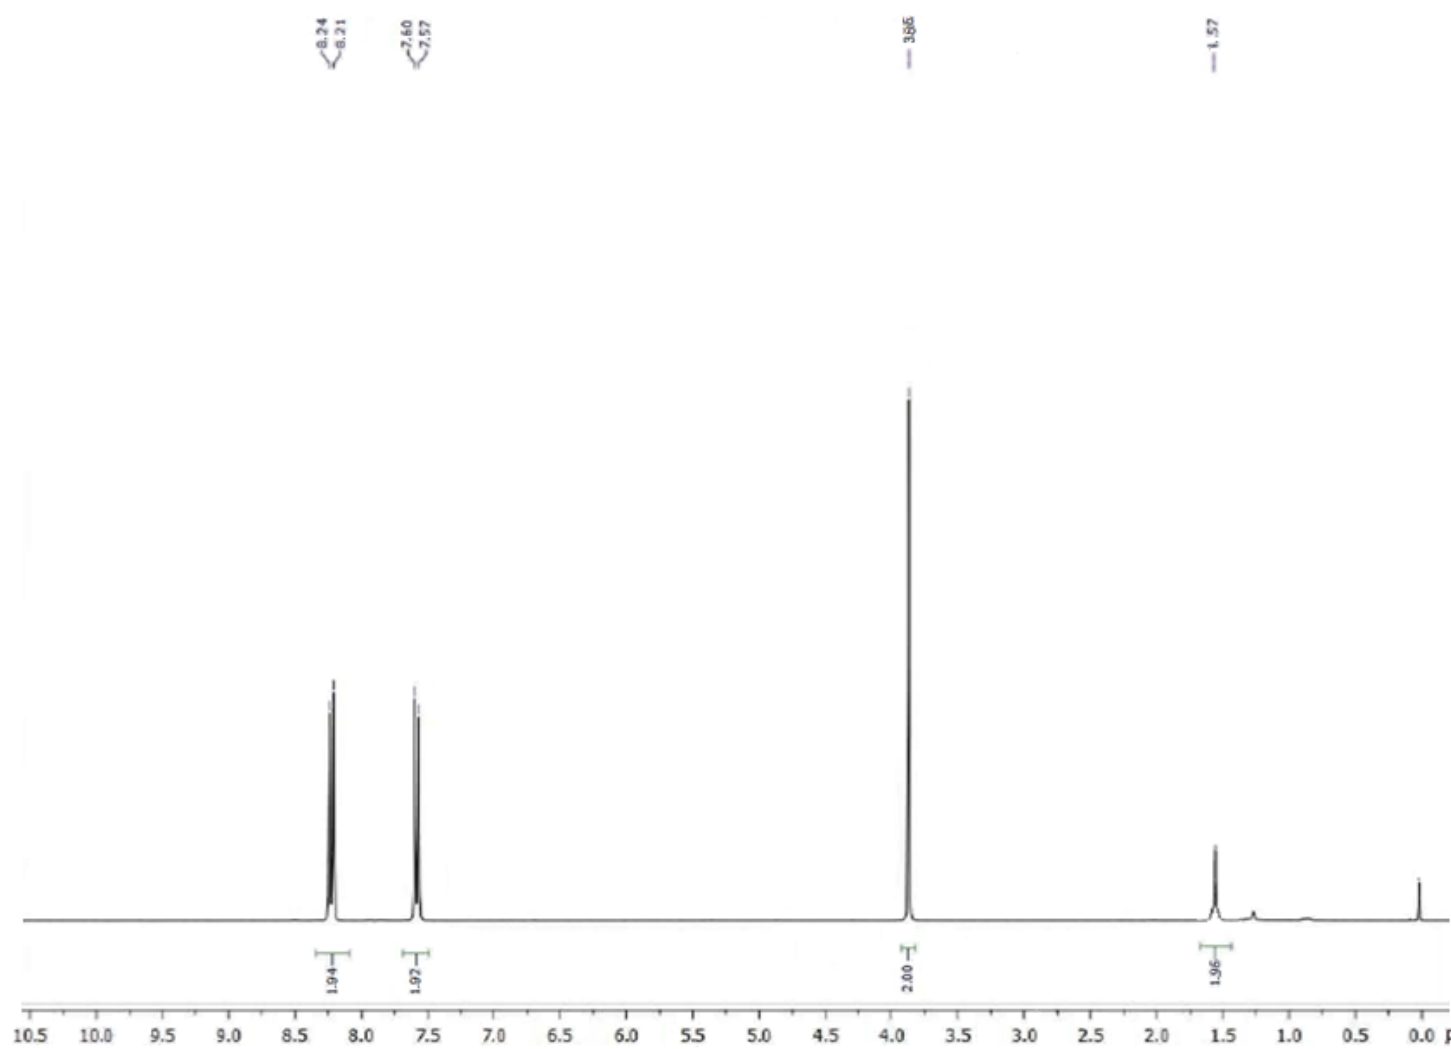

Compound 3p.  $^{13}\text{C}$  NMR Spectrum ( $\text{CDCl}_3$ ).

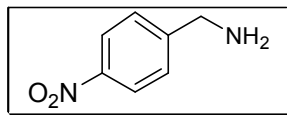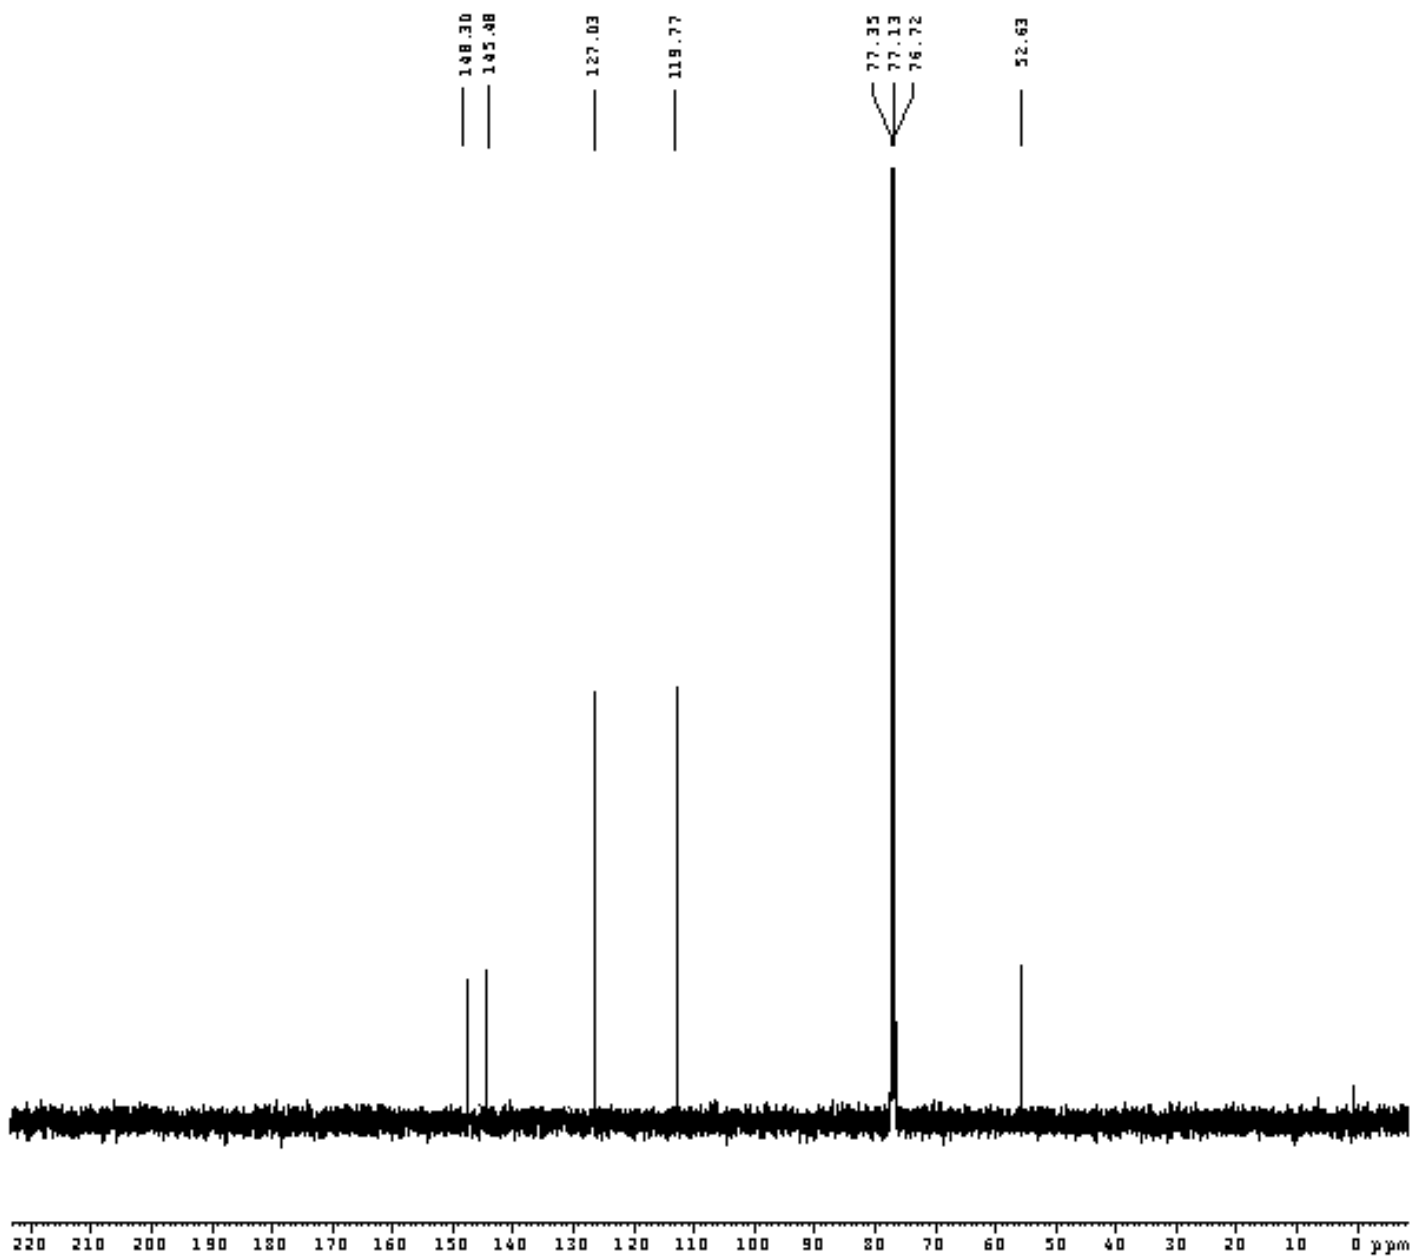

Supplement: c4ra05929h1.pdf [file c4ra05929h1.pdf]
